# Supplementary material for: Sustainable fabrication of NiCuFe2O4 nanospheres: a highly effective palladium-free heterogeneous catalyst for biaryl scaffold synthesis via a Suzuki–Miyaura cross-coupling reaction
Source: Royal Society of Chemistry journal article supplement (doi:10.1039/d4cy01100g), 2024-11-14
Supplement: d4cy01100g1.pdf [file d4cy01100g1.pdf]

## Supporting Information

### **Sustainable Fabrication of NiCuFe<sub>2</sub>O<sub>4</sub> Nanosphere: A Highly Effective Palladium-Free Heterogeneous Catalyst for Biaryl Scaffold Synthesis via Suzuki-Miyaura Cross-Coupling Reaction**

Tikendrajit Chetia, Amarjyoti Kalita, Aquif Suleman, Bolin Chetia\*

*Department of Chemistry, Dibrugarh University, Dibrugarh-786004, Assam, India*

Corresponding Author Email: [bolinchetia@dibru.ac.in](mailto:bolinchetia@dibru.ac.in)

### Table of Contents

|                                                                                                       |         |
|-------------------------------------------------------------------------------------------------------|---------|
| 1. BET Analysis of NCF-3 nanoparticles (Figure S1)                                                    | S2      |
| 2. Analysis of recovered catalyst (Figure S2-S4)                                                      | S2-S3   |
| 3. Table S1: ICP-MS Result                                                                            | S4      |
| 4. Table S2: S-M coupling of different aryl halides (-Cl/ -F) with a number of heteroarylboronic acid | S4-S5   |
| 5. Spectral data of representative compounds                                                          | S5-S8   |
| 6. <sup>1</sup> H and <sup>13</sup> C NMR of compounds (Figure S5-S42)                                | S8-S27  |
| 7. ESI-MS Spectra of compounds (Figure S43-S46)                                                       | S28-S29 |

## 1. BET Analysis of NCF-3 nanoparticles

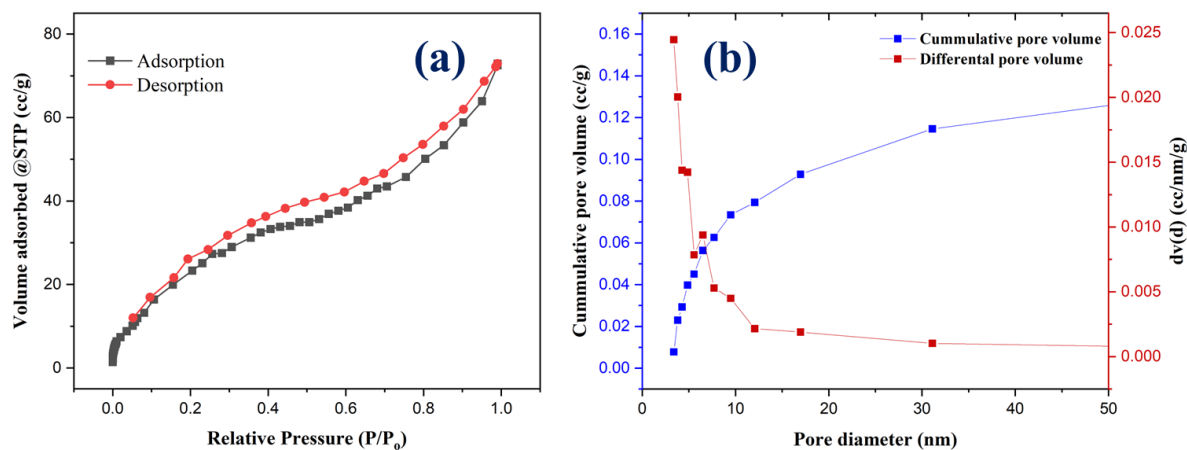

**Figure S1.** (a)  $N_2$  adsorption-desorption isotherm of the as-synthesized NCF-3 NPs at 77 K; (b) Pore size distribution graph between the pore volume distribution vs. the pore diameter of NCF-3 NPs.

## 2. Analysis of Recovered Catalyst

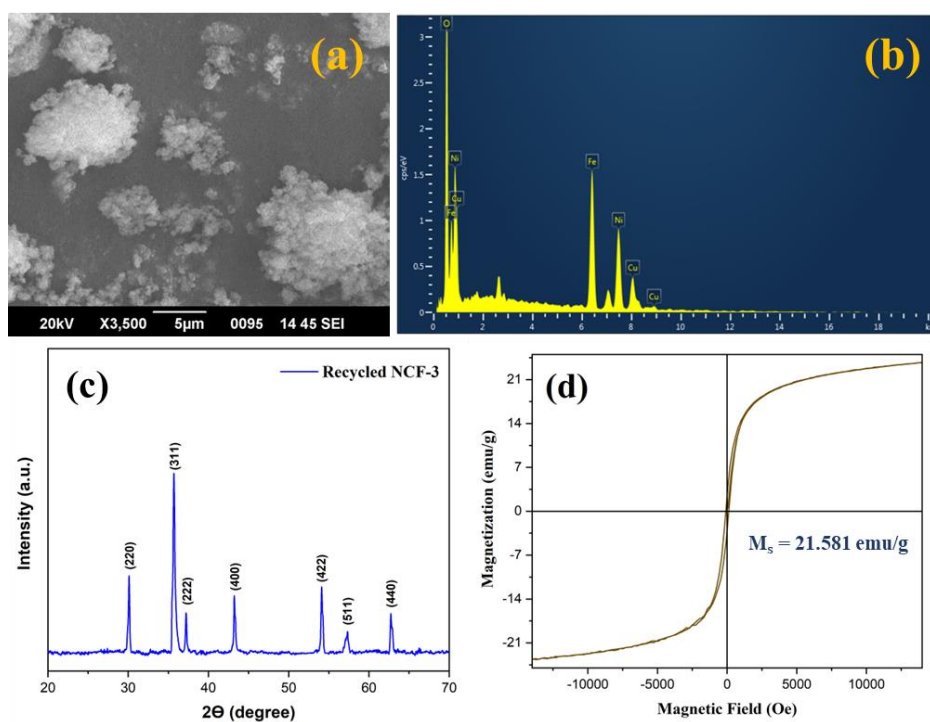

**Figure S2.** (a) SEM image; (b) EDX image; (c) XRD; and (d) VSM data of reused NCF-3 NPs (5<sup>th</sup> cycle).

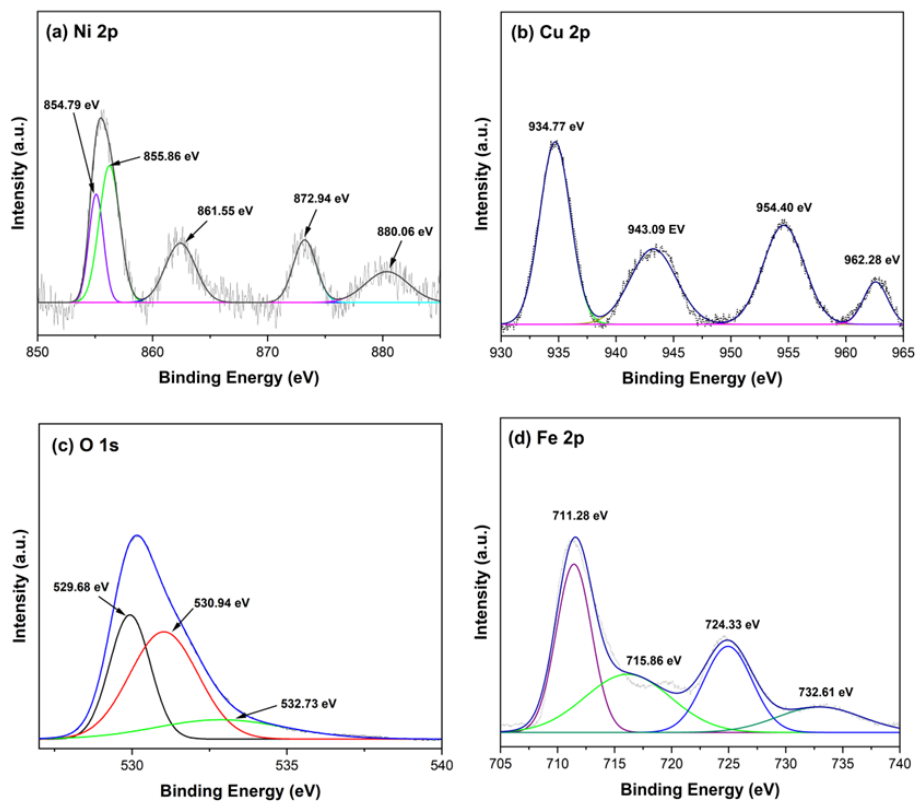

**Figure S3.** XPS of the reused NCF-3 NPs (5<sup>th</sup> cycle) (a) Ni 2p, (b) Cu 2p, (c) Fe 2p and (c) O 1s regions.

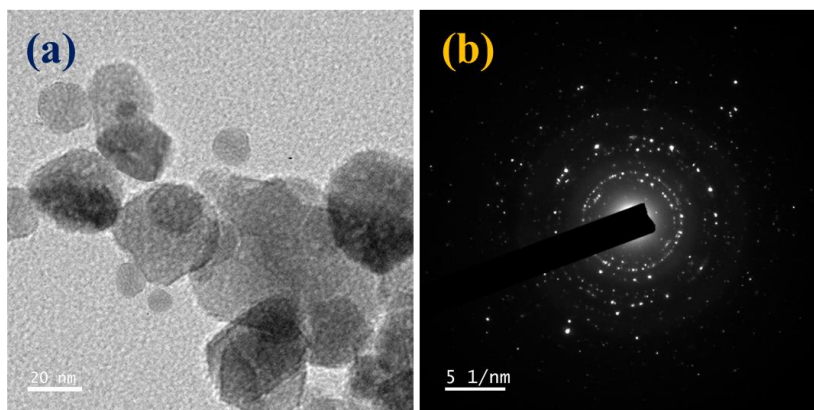

**Figure S4.** (a) TEM image and (b) SAED of the reused NCF-3 catalyst (5<sup>th</sup> cycle).

### 3. Table S1: ICP-MS Result

| Sl. No.                | Sample Name | Cu    | Ni    | Fe     |
|------------------------|-------------|-------|-------|--------|
| 1                      | NCF-3       | 4.075 | 3.638 | 11.924 |
| 2                      | NP-7        | -     | -     | -      |
| Unit                   |             | %     | %     | %      |
| Detection Limit in ppm |             | 0.01  | 0.01  | 0.10   |

### 4. Table S2: S-M coupling of different aryl halides (-Cl/ -F) with a number of heteroarylboronic acid <sup>a</sup>

| Entry | Aryl halide                                                                         | Heteroarylboronic acid                                                               | Yield (%) |
|-------|-------------------------------------------------------------------------------------|--------------------------------------------------------------------------------------|-----------|
| 1     | 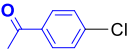   |    | Trace     |
| 2     |   |   | -         |
| 3     |  |  | Trace     |
| 4     |  |  | -         |
| 5     |  |  | -         |
| 6     |  |  | -         |
| 7     |  |  | Trace     |
| 8     |  |  | -         |
| 9     |  |  | -         |
| 10    |  |  | -         |
| 11    |  |  | -         |
| 12    |  |  | Trace     |
| 13    |  |  | Trace     |
| 14    |  |  | -         |

|    |                                                                                   |                                                                                    |   |
|----|-----------------------------------------------------------------------------------|------------------------------------------------------------------------------------|---|
| 15 |  |  | - |
|----|-----------------------------------------------------------------------------------|------------------------------------------------------------------------------------|---|

<sup>a</sup> Reaction condition: Aryl halide (1 mmol), heteroaryl boronic acid (1.1 mmol), NiCuFe<sub>2</sub>O<sub>4</sub> (3 mol %), K<sub>2</sub>CO<sub>3</sub> (1.4 mmol), 3 mL of EtOH: H<sub>2</sub>O (2:1) at 60 °C.

## 5. Spectral data of representative compounds

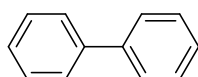

**1,1'-biphenyl:** White solid; m.p. 70 °C;

<sup>1</sup>H NMR (500 MHz, CDCl<sub>3</sub>) δ 7.68 (d, *J* = 7.6 Hz, 4H), 7.53 (t, *J* = 7.5 Hz, 4H), 7.43 (t, *J* = 7.4 Hz, 2H).

<sup>13</sup>C NMR (126 MHz, CDCl<sub>3</sub>) δ 141.31, 128.84, 127.34, 127.25.

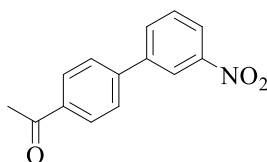

**1-(3'-nitro-[1,1'-biphenyl]-4-yl)ethan-1-one:** Yellow solid;

<sup>1</sup>H NMR (500 MHz, CDCl<sub>3</sub>) δ 8.38 (d, *J* = 4.0 Hz, 1H), 8.18 (d, *J* = 8.2 Hz, 1H), 7.83 (d, *J* = 7.6 Hz, 1H), 7.53 (t, *J* = 8.0 Hz, 2H), 7.49 – 6.99 (m, 4H), 2.40 (s, 3H).

<sup>13</sup>C NMR (125 MHz, CDCl<sub>3</sub>) δ 197.13, 148.97, 146.72, 138.55, 132.71, 131.44, 129.66, 126.51, 124.82, 115.95, 27.10.

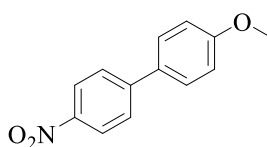

**4-methoxy-4'-nitro-1,1'-biphenyl:** Pale yellow solid;

<sup>1</sup>H NMR (500 MHz, CDCl<sub>3</sub>) δ 8.22 (d, *J* = 9.0 Hz, 2H), 7.65 (d, *J* = 8.9 Hz, 2H), 7.52 (d, *J* = 8.7 Hz, 2H), 6.93 (d, *J* = 8.9 Hz, 2H), 3.86 (s, 3H).

<sup>13</sup>C NMR (125 MHz, CDCl<sub>3</sub>) δ 160.45, 146.72, 133.46, 132.00, 130.72, 123.63, 114.24, 114.15, 95.16, 86.66, 55.38.

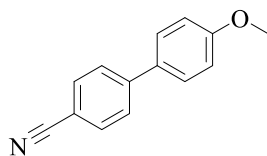

**4-methoxy-[1,1'-biphenyl]-4-carbonitrile:** Pale white solid;

<sup>1</sup>H NMR (500 MHz, DMSO) δ 7.90 – 7.81 (m, 4H), 7.72 (t, *J* = 8.3 Hz, 2H), 7.03 (d, *J* = 8.4 Hz, 2H), 3.84 (s, 3H).

<sup>13</sup>C NMR (125 MHz, CDCl<sub>3</sub>) δ 160.52, 146.79, 132.19, 132.15, 128.29, 128.23, 120.53, 115.32, 110.81, 55.75.

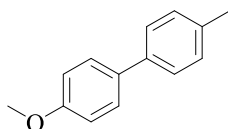

**4-methoxy-4'-methyl-1,1'-biphenyl:** White solid;

<sup>1</sup>H NMR (500 MHz, CDCl<sub>3</sub>) δ 7.71 (d, *J* = 8.4 Hz, 2H), 7.53 (d, *J* = 8.2 Hz, 2H), 7.08 – 7.02 (m, 4H), 3.86 (s, 3H), 2.48 (s, 3H).

<sup>13</sup>C NMR (125 MHz, CDCl<sub>3</sub>) δ 157.29, 137.08, 136.96, 129.97, 129.89, 128.99, 127.99, 127.20, 125.18, 115.32, 55.19, 22.31.

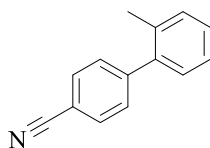

**2'-methyl-[1,1'-biphenyl]-4-carbonitrile:** White solid;

<sup>1</sup>H NMR (500 MHz, CDCl<sub>3</sub>) δ 7.72 (d, *J* = 8.1 Hz, 2H), 7.64 (d, *J* = 8.4 Hz, 2H), 7.46 (d, *J* = 8.0 Hz, 2H), 7.31 (d, *J* = 8.4 Hz, 2H), 2.42 (s, 3H).

<sup>13</sup>C NMR (125 MHz, CDCl<sub>3</sub>) δ 160.45, 146.72, 133.46, 132.00, 130.72, 123.63, 114.24, 114.15, 95.16, 86.66, 55.38.

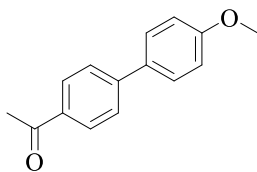

**1-(4-methoxy-[1,1'-biphenyl]-4-yl)ethan-1-one:** Pale white solid;

$^1\text{H NMR}$  (500 MHz,  $\text{CDCl}_3$ )  $\delta$  7.96 (d,  $J = 8.4$  Hz, 2H), 7.64 (d,  $J = 7.3$  Hz, 2H), 7.39 (t,  $J = 8.3$  Hz, 2H), 6.98 (d,  $J = 8.3$  Hz, 2H), 3.81 (s, 3H), 2.64 (s, 3H).

$^{13}\text{C NMR}$  (125 MHz,  $\text{CDCl}_3$ )  $\delta$  197.32, 160.45, 147.07, 136.23, 131.71, 128.83, 128.46, 128.29, 128.23, 116.62, 56.74, 26.62.

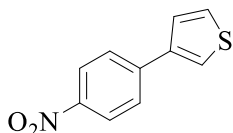

**3-(4-nitrophenyl)thiophene:** Yellow solid;

$^1\text{H NMR}$  (500 MHz, DMSO)  $\delta$  8.28 (d,  $J = 8.3$  Hz, 2H), 7.82 – 7.73 (m, 2H), 7.61 – 7.49 (m, 2H), 7.42 (d,  $J = 7.8$  Hz, 1H).

$^{13}\text{C NMR}$  (125 MHz,  $\text{CDCl}_3$ )  $\delta$  146.79, 139.75, 132.22, 130.10, 129.97, 127.20, 125.18, 122.15, 55.26.

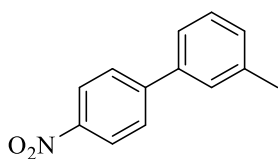

**3-methyl-4'-nitro-1,1'-biphenyl:** Yellow solid;

$^1\text{H NMR}$  (500 MHz, DMSO)  $\delta$  8.24 (d,  $J = 7.5$  Hz, 1H), 8.13 (d,  $J = 8.2$  Hz, 2H), 7.71 (d,  $J = 8.0$  Hz, 2H), 7.48 (t,  $J = 6.7$  Hz, 1H), 7.31 – 7.24 (m, 2H), 2.84 (s, 3H).

$^{13}\text{C NMR}$  (125 MHz,  $\text{CDCl}_3$ )  $\delta$  146.77, 141.95, 139.75, 129.75, 129.27, 124.26, 124.08, 22.13.

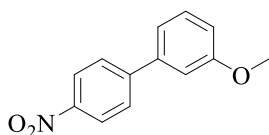

**3-methoxy-4'-nitro-1,1'-biphenyl:** Yellow solid;

$^1\text{H NMR}$  (500 MHz,  $\text{CDCl}_3$ )  $\delta$  8.19 (d,  $J = 8.0$  Hz, 2H), 7.61 – 7.54 (m, 2H), 6.88 (d,  $J = 8.2$  Hz, 2H), 3.83 (s, 3H).

$^{13}\text{C NMR}$  (125 MHz,  $\text{CDCl}_3$ )  $\delta$  158.43, 142.89, 133.16, 132.87, 130.26, 123.11, 114.93, 114.78, 92.61, 55.27.

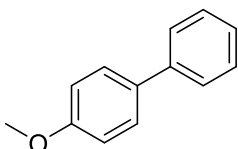

**4-methoxy-1,1'-biphenyl:** Pale white solid; m.p. 88 °C;

$^1\text{H NMR}$  (500 MHz,  $\text{CDCl}_3$ )  $\delta$  7.59 – 7.52 (m, 3H), 7.43 (t,  $J = 7.5$  Hz, 2H), 7.31 (t,  $J = 8.5$  Hz, 2H), 6.89 (d,  $J = 8$  Hz, 2H), 3.82 (s, 3H).

$^{13}\text{C NMR}$  (125 MHz,  $\text{CDCl}_3$ )  $\delta$  160.25, 142.04, 133.33, 129.29, 127.42, 126.17, 125.55, 124.82, 114.24, 114.19, 55.35.

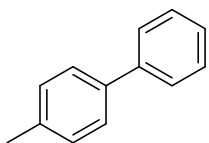

**4-methyl-1,1'-biphenyl:** White solid; m.p. 49 °C;

$^1\text{H NMR}$  (500 MHz,  $\text{CDCl}_3$ )  $\delta$  7.71 (d,  $J = 8.4$  Hz, 2H), 7.49 (d,  $J = 3.3$  Hz, 2H), 7.39 – 7.21 (m, 5H), 2.48 (s, 3H).

$^{13}\text{C NMR}$  (126 MHz,  $\text{CDCl}_3$ )  $\delta$  140.10, 136.89, 134.48, 130.29, 130.21, 129.38, 127.99, 127.20, 125.84, 21.09.

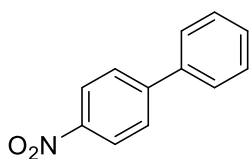

**4-nitro-1,1'-biphenyl:** Light brown solid; m.p. 113 °C;

$^1\text{H NMR}$  (500 MHz,  $\text{CDCl}_3$ )  $\delta$  8.28 (d,  $J = 6.6$  Hz, 2H), 7.77 (d,  $J = 7.3$  Hz, 2H), 7.63 (d,  $J = 7.5$  Hz, 2H), 7.56 – 7.43 (m, 3H).

$^{13}\text{C NMR}$  (126 MHz,  $\text{CDCl}_3$ )  $\delta$  148.20, 139.89, 136.66, 132.29, 129.21, 126.70, 117.38, 110.65, 21.13.

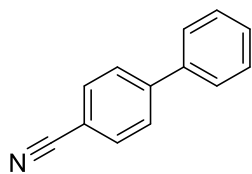

**[1,1'-biphenyl]-4-carbonitrile:** Light yellow solid; m.p. 80 °C;

$^1\text{H NMR}$  (500 MHz,  $\text{CDCl}_3$ )  $\delta$  7.74 (d,  $J = 7.4$  Hz, 2H), 7.69 (d,  $J = 7.5$  Hz, 2H), 7.58 (d,  $J = 7.4$  Hz, 2H), 7.49 (t,  $J = 7.6$  Hz, 2H), 7.40 (t,  $J = 7.5$  Hz, 1H).

$^{13}\text{C NMR}$  (125 MHz,  $\text{CDCl}_3$ )  $\delta$  145.87, 139.54, 132.50, 129.69, 128.73, 127.84, 127.41, 125.59, 118.98, 110.67.

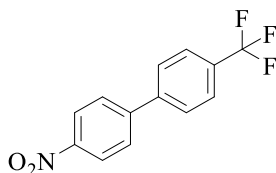

**4-nitro-4'-(trifluoromethyl)-1,1'-biphenyl:** Yellow solid;

$^1\text{H NMR}$  (500 MHz,  $\text{CDCl}_3$ )  $\delta$  8.38 (d,  $J = 8.0$  Hz, 2H), 7.79 – 7.73 (m, 6H).

$^{13}\text{C NMR}$  (125 MHz,  $\text{CDCl}_3$ )  $\delta$  147.78, 146.09, 129.54, 128.13, 126.02, 125.74, 124.12.

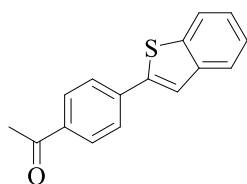

**1-(4-(benzo[b]thiophen-2-yl)phenyl)ethan-1-one:** Pale white solid;

$^1\text{H NMR}$  (500 MHz,  $\text{CDCl}_3$ )  $\delta$  8.02 (d,  $J = 8.4$  Hz, 2H), 7.85 (t,  $J = 8.3$  Hz, 4H), 7.68 (d,  $J = 8.4$  Hz, 1H), 7.40 (t,  $J = 8.2$  Hz, 2H), 2.62 (s, 3H).

$^{13}\text{C NMR}$  (125 MHz,  $\text{CDCl}_3$ )  $\delta$  196.44, 144.98, 141.11, 139.10, 137.88, 135.73, 129.64, 128.85, 126.70, 125.60, 123.33, 121.11, 24.57.

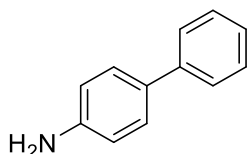

**[1,1'-biphenyl]-4-amine:** Pale yellow solid; m.p. 104 °C;

$^1\text{H NMR}$  (500 MHz,  $\text{CDCl}_3$ )  $\delta$  7.59 (d,  $J = 7.6$  Hz, 2H), 7.50 – 7.42 (m, 4H), 7.30 (d,  $J = 7.5$  Hz, 1H), 6.73 (d,  $J = 7.4$  Hz, 2H), 3.67 (s, 2H).

$^{13}\text{C NMR}$  (126 MHz,  $\text{CDCl}_3$ )  $\delta$  146.30, 141.58, 133.41, 129.72, 128.34, 126.72, 126.16, 118.01.

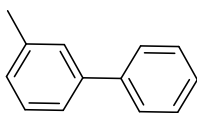

**3-methyl-1,1'-biphenyl:** White oil;

$^1\text{H NMR}$  (500 MHz,  $\text{CDCl}_3$ )  $\delta$  7.59 (d,  $J = 7.2$  Hz, 2H), 7.44 (t,  $J = 8.2$  Hz, 4H), 7.38 – 7.29 (m, 2H), 7.15 (d,  $J = 7.5$  Hz, 1H), 2.42 (s, 3H).

$^{13}\text{C NMR}$  (126 MHz,  $\text{CDCl}_3$ )  $\delta$  141.47, 141.36, 138.49, 128.75, 128.14, 127.31, 124.39, 21.83.

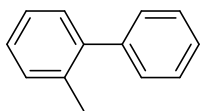

**2-methyl-1,1'-biphenyl:** Colorless oil;

$^1\text{H NMR}$  (500 MHz,  $\text{CDCl}_3$ )  $\delta$  7.49 – 7.39 (m, 2H), 7.33 – 7.28 (m, 3H), 7.26 – 7.24 (m, 2H), 7.21 – 7.18 (m, 2H), 2.28 (s, 3H).

$^{13}\text{C NMR}$  (126 MHz,  $\text{CDCl}_3$ )  $\delta$  146.30, 137.26, 132.65, 132.23, 130.61, 130.03, 125.22, 125.04, 23.14.

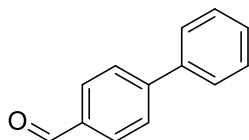

**[1,1'-biphenyl]-4-carbaldehyde:** White solid; m.p. 58 °C;

$^1\text{H NMR}$  (500 MHz,  $\text{CDCl}_3$ )  $\delta$  9.97 (s, 1H), 7.88 – 7.80 (m, 2H), 7.68 (d,  $J = 7.9$  Hz, 2H), 7.61 – 7.54 (m, 2H), 7.48 (t,  $J = 8.0$  Hz, 2H), 7.32 (t,  $J = 7.9$  Hz, 1H).

$^{13}\text{C NMR}$  (126 MHz,  $\text{CDCl}_3$ )  $\delta$  192.29, 147.89, 138.23, 134.55, 131.37, 130.83, 129.30, 128.35, 127.95, 127.37.

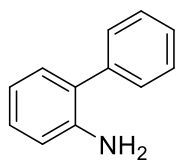

**[1,1'-biphenyl]-2-amine:** Light brown solid; m.p. 50 °C;

<sup>1</sup>H NMR (500 MHz, CDCl<sub>3</sub>) δ 7.49 – 7.36 (m, 4H), 7.28 – 7.04 (m, 2H), 7.18 – 7.12 (m, 2H), 6.80 (t, *J* = 7.4 Hz, 1H), 3.77 (s, 2H).

<sup>13</sup>C NMR (126 MHz, CDCl<sub>3</sub>) δ 143.57, 139.82, 131.36, 129.34, 128.42, 127.89, 127.20, 118.67.

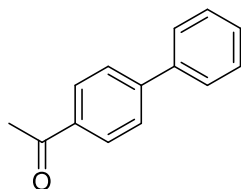

**1-([1,1'-biphenyl]-4-yl)ethan-1-one:** Pale White solid; m.p. 120 °C;

<sup>1</sup>H NMR (500 MHz, CDCl<sub>3</sub>) δ 8.08 (d, *J* = 8.2 Hz, 2H), 7.73 (d, *J* = 8.4 Hz, 2H), 7.67 (d, *J* = 8.4 Hz, 2H), 7.49 (t, *J* = 8.7 Hz, 2H), 7.44 – 7.36 (m, 1H), 2.64 (s, 3H).

<sup>13</sup>C NMR (126 MHz, CDCl<sub>3</sub>) δ 197.73, 145.68, 139.88, 136.04, 129.20, 128.99, 128.36, 127.40, 26.72.

## 6. <sup>1</sup>H and <sup>13</sup>C NMR of compounds



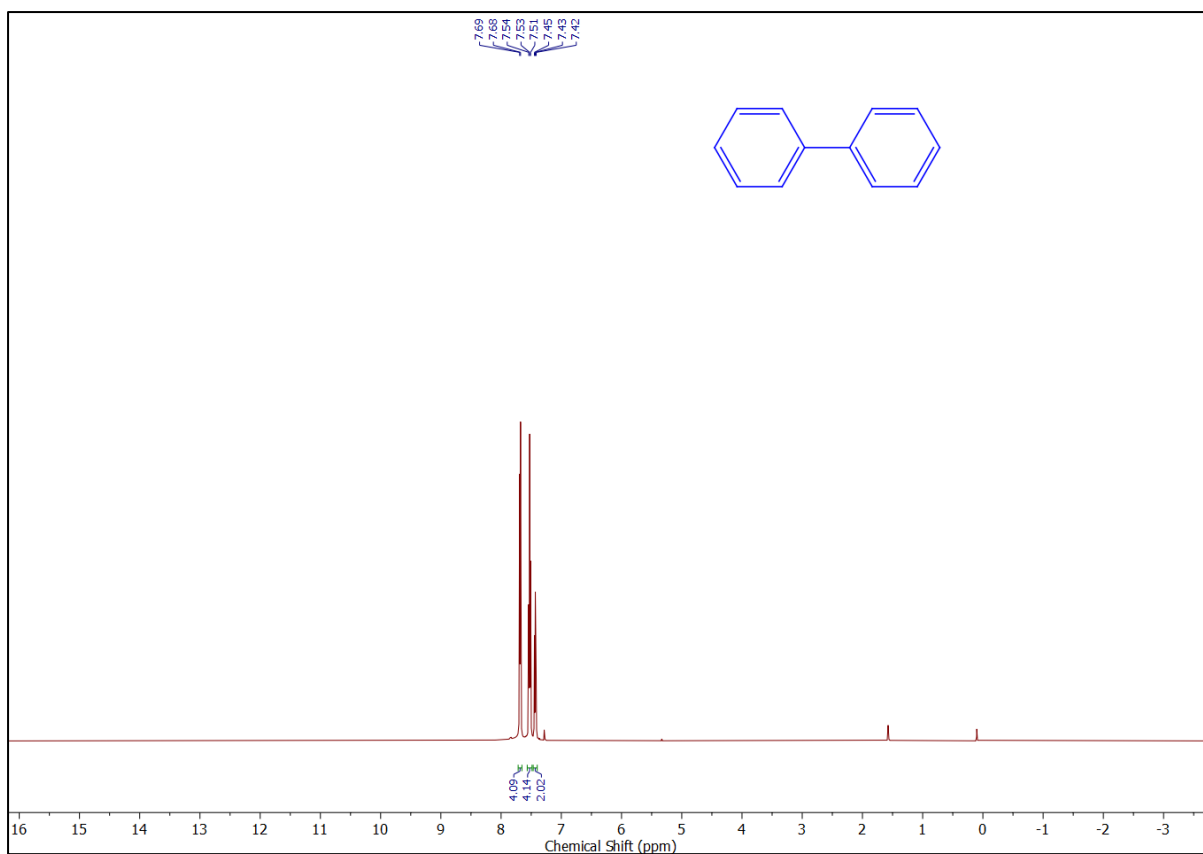

**Figure S5:** <sup>1</sup>H NMR spectrum of 1,1'-biphenyl

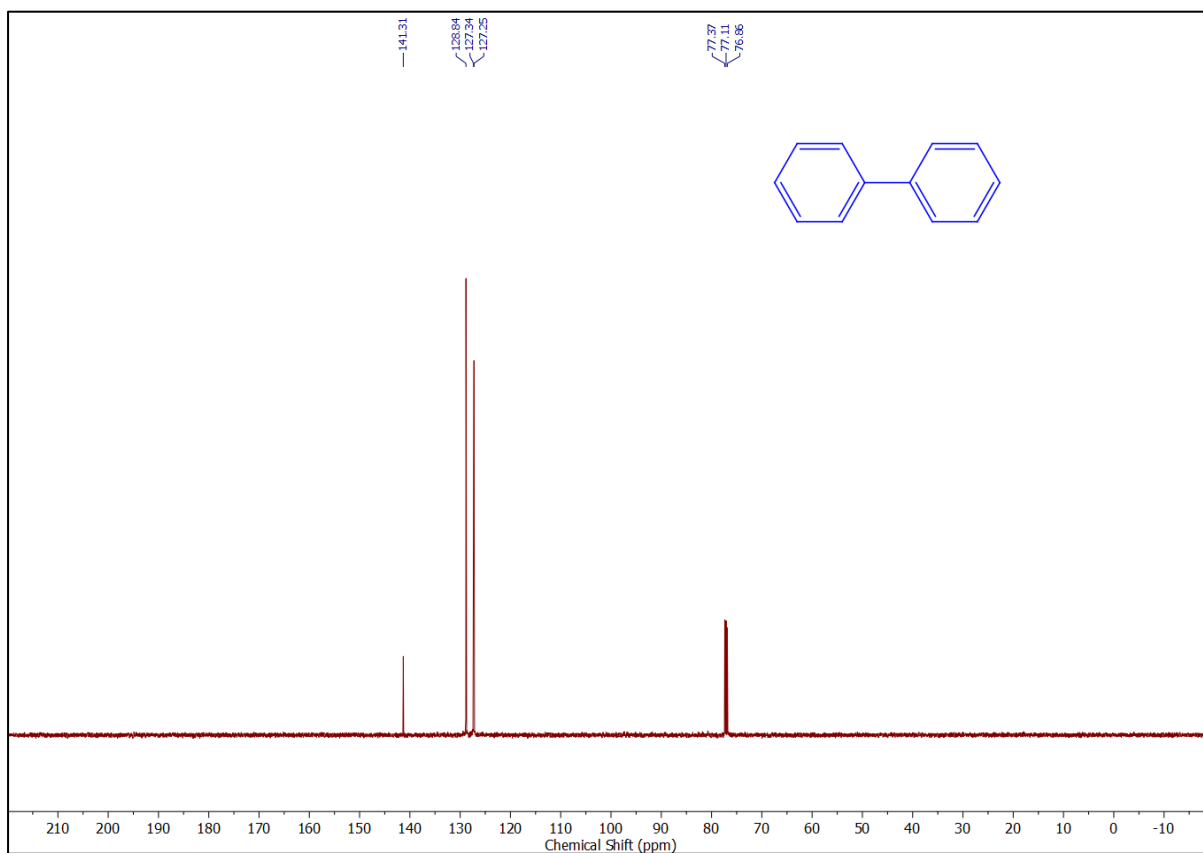

**Figure S6:** <sup>13</sup>C NMR spectrum of 1,1'-biphenyl

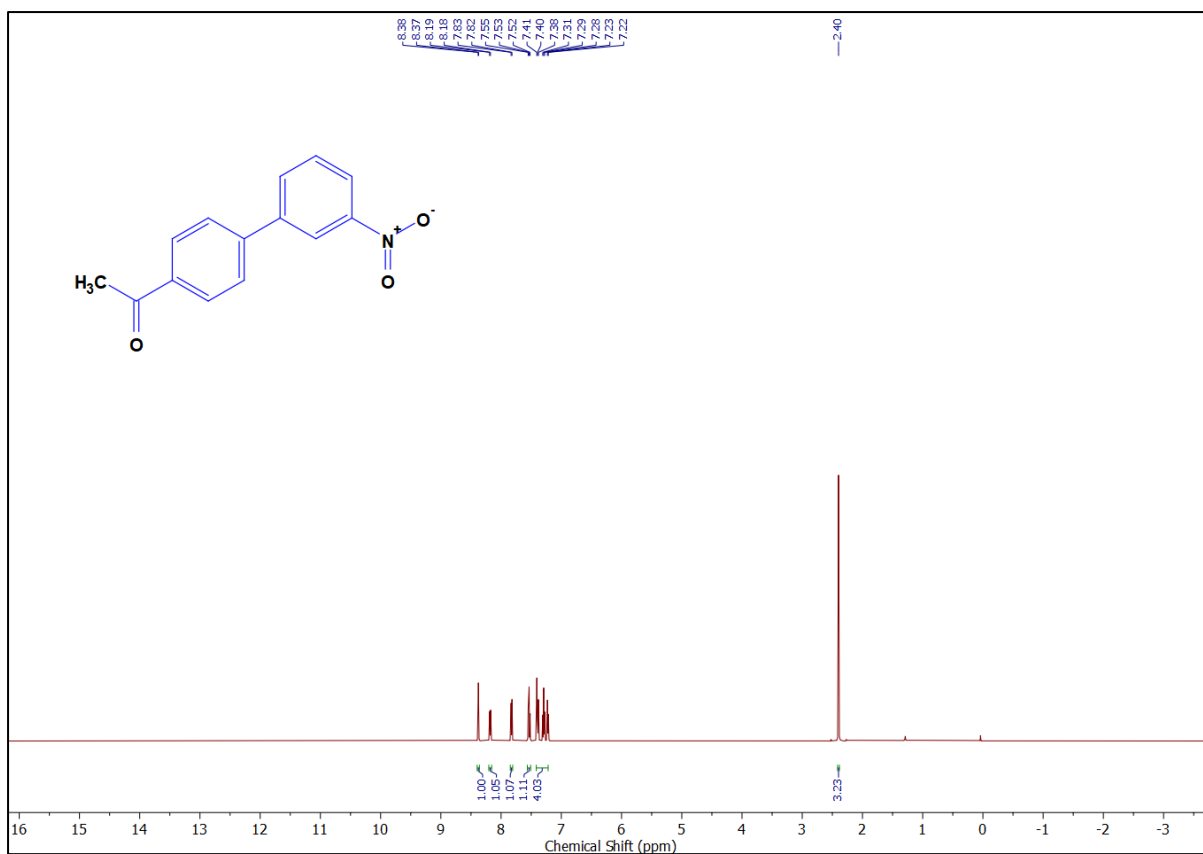

Figure S7: <sup>1</sup>H NMR spectrum of 1-(3'-nitro-[1,1'-biphenyl]-4-yl)ethan-1-one

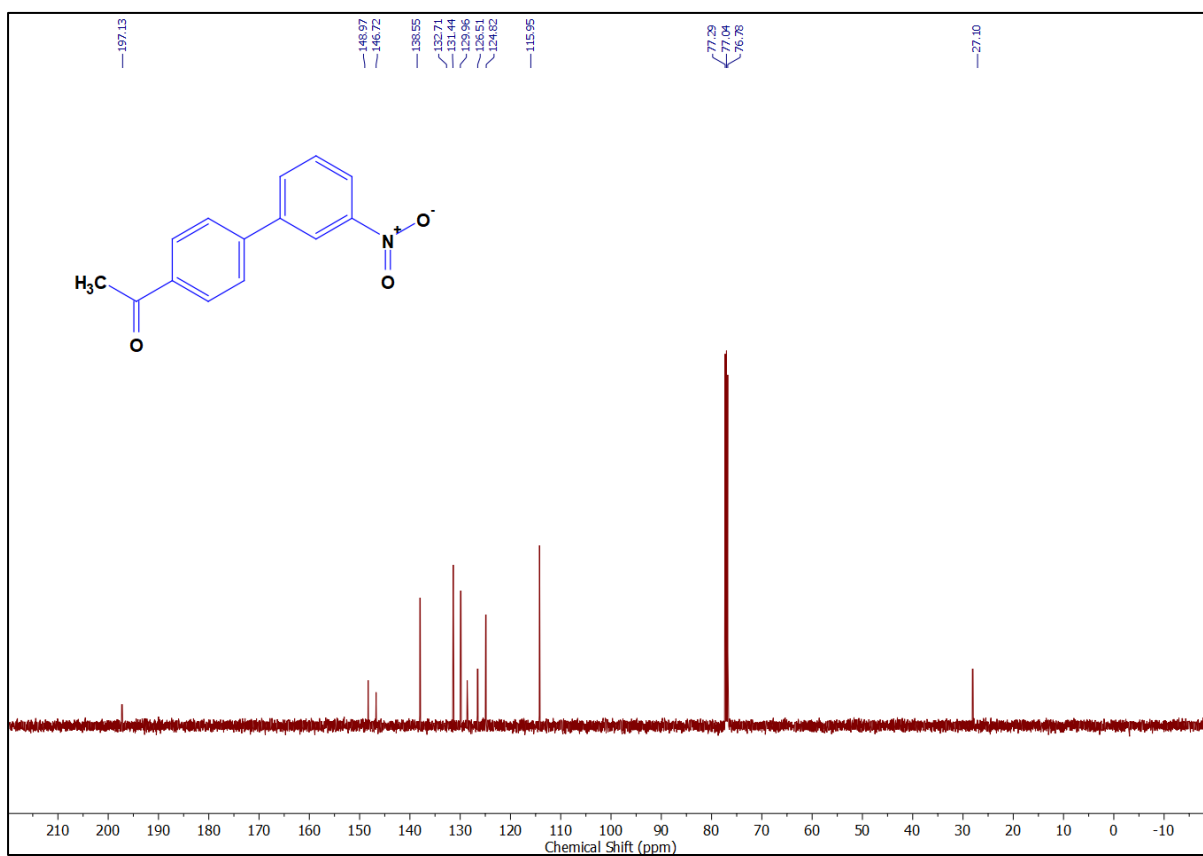

Figure S8: <sup>13</sup>C NMR spectrum of 1-(3'-nitro-[1,1'-biphenyl]-4-yl)ethan-1-one

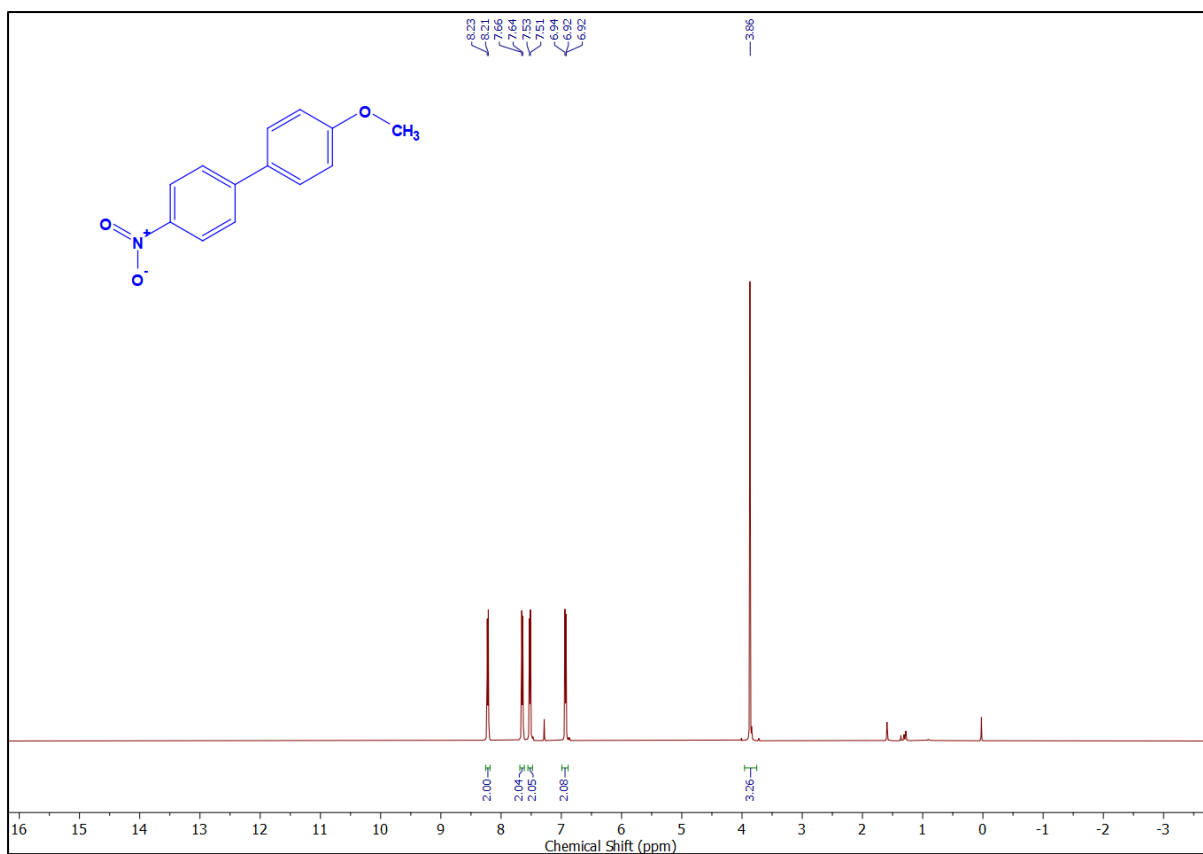

Figure S9:  $^1\text{H}$  NMR spectrum of 4-methoxy-4'-nitro-1,1'-biphenyl

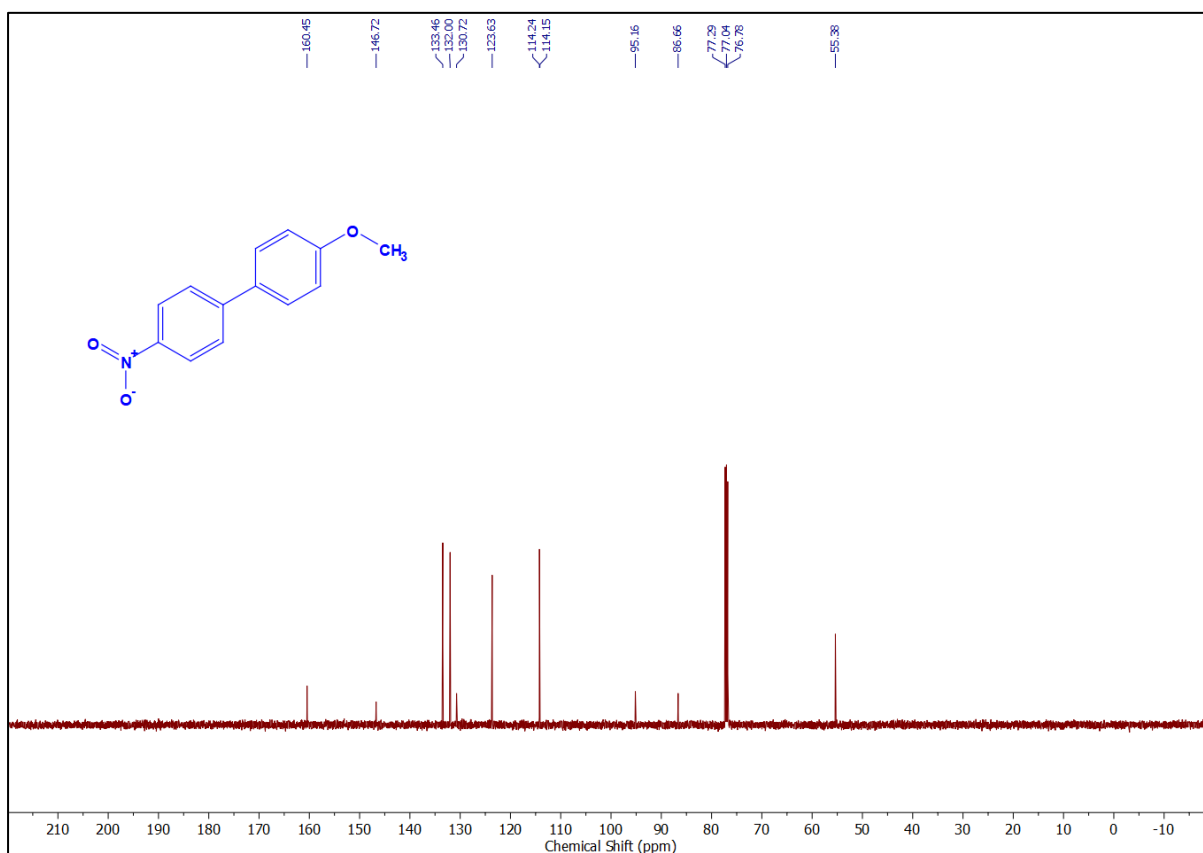

Figure S10:  $^{13}\text{C}$  NMR spectrum of 4-methoxy-4'-nitro-1,1'-biphenyl

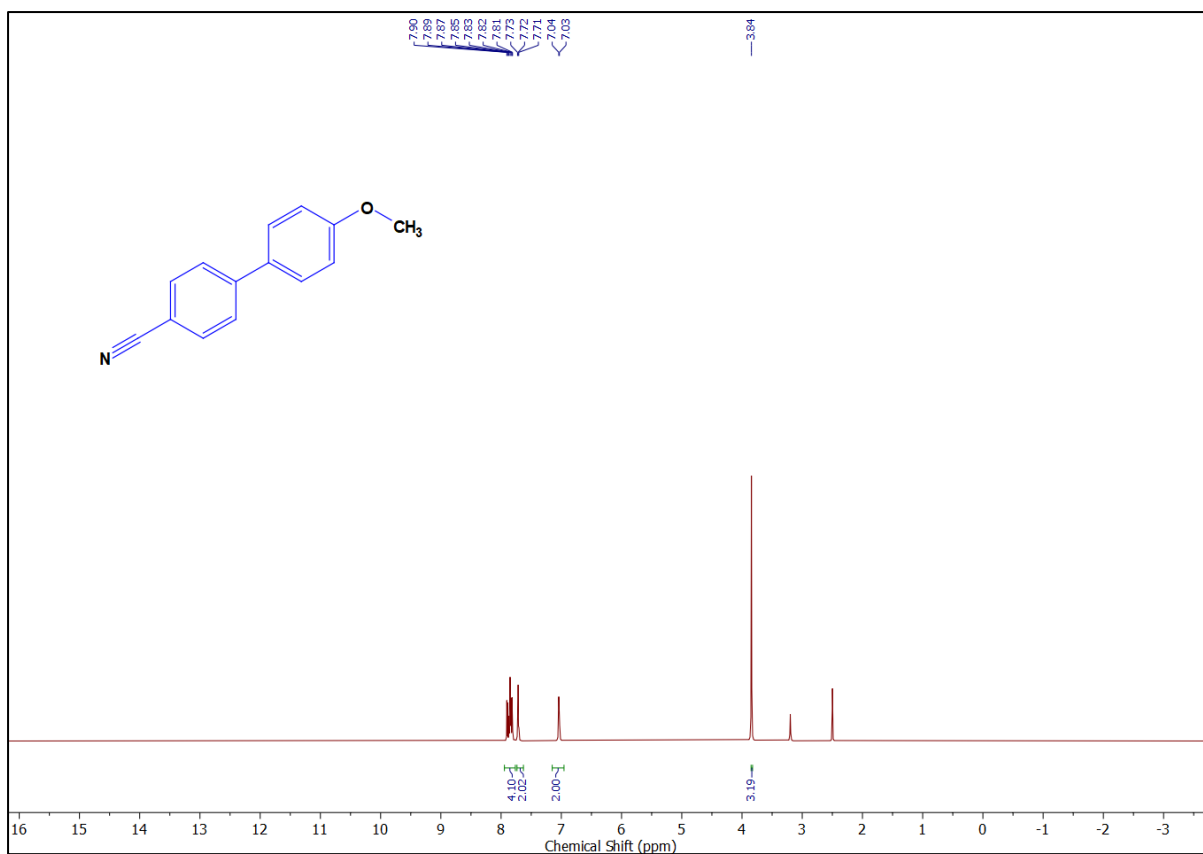

Figure S11:  $^1\text{H}$  NMR spectrum of 4'-methoxy-[1,1'-biphenyl]-4-carbonitrile

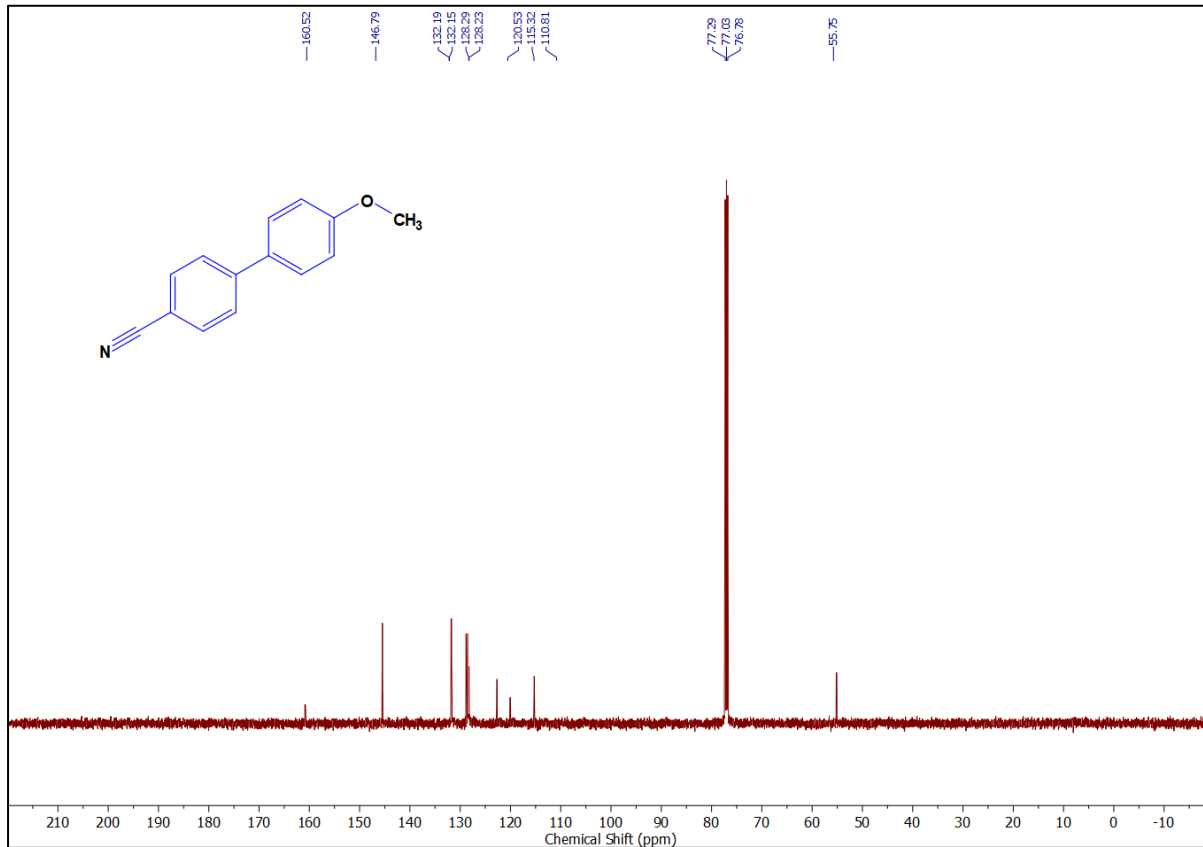

Figure S12:  $^{13}\text{C}$  NMR spectrum of 4'-methoxy-[1,1'-biphenyl]-4-carbonitrile

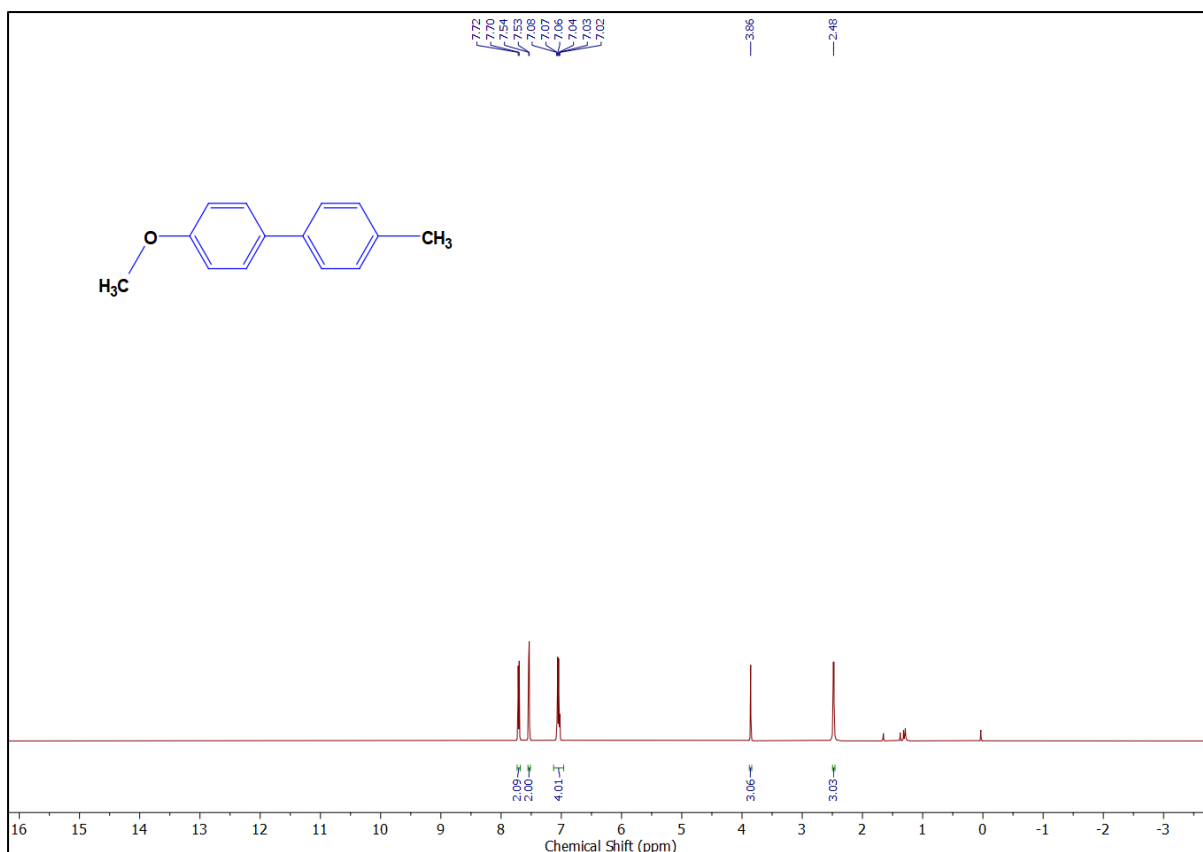

Figure S13:  $^1\text{H}$  NMR spectrum of 4-methoxy-4'-methyl-1,1'-biphenyl

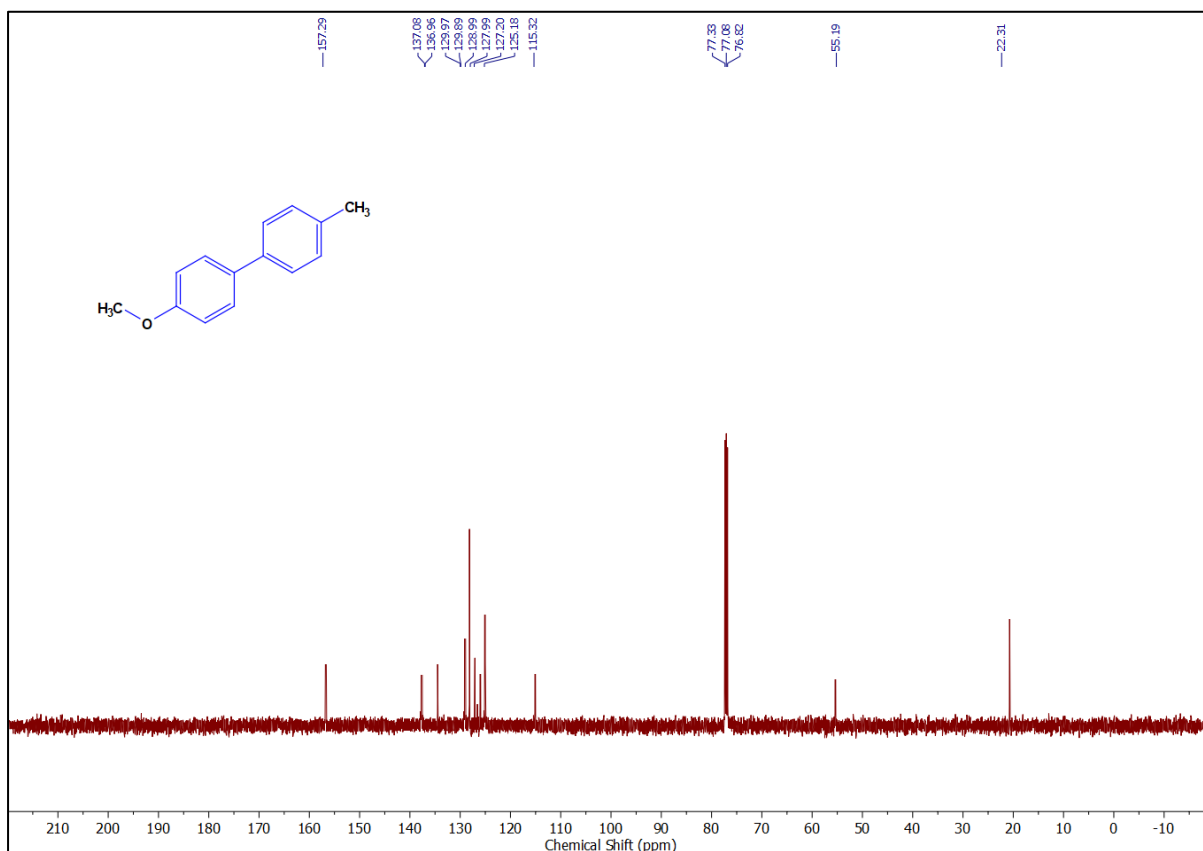

Figure S14:  $^{13}\text{C}$  NMR spectrum of 4-methoxy-4'-methyl-1,1'-biphenyl

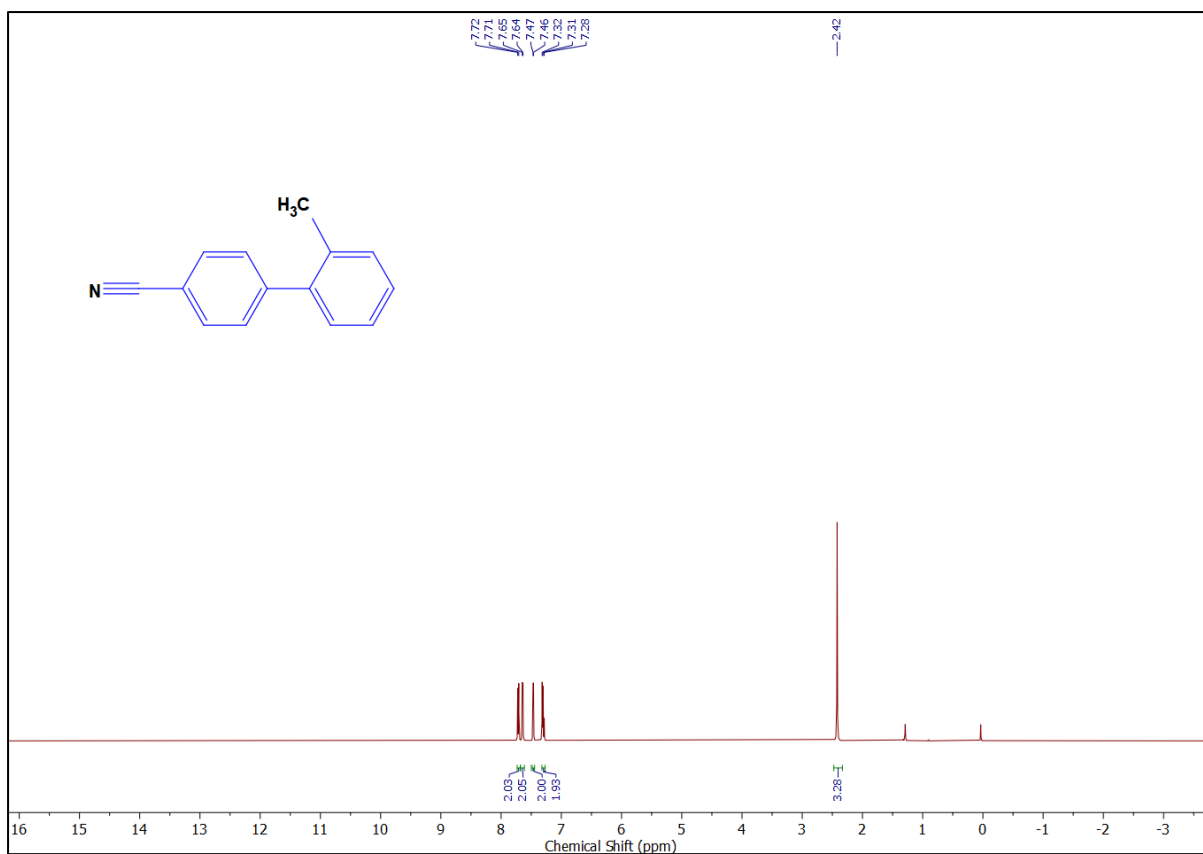

Figure S15: <sup>1</sup>H NMR spectrum of 2'-methyl-[1,1'-biphenyl]-4-carbonitrile

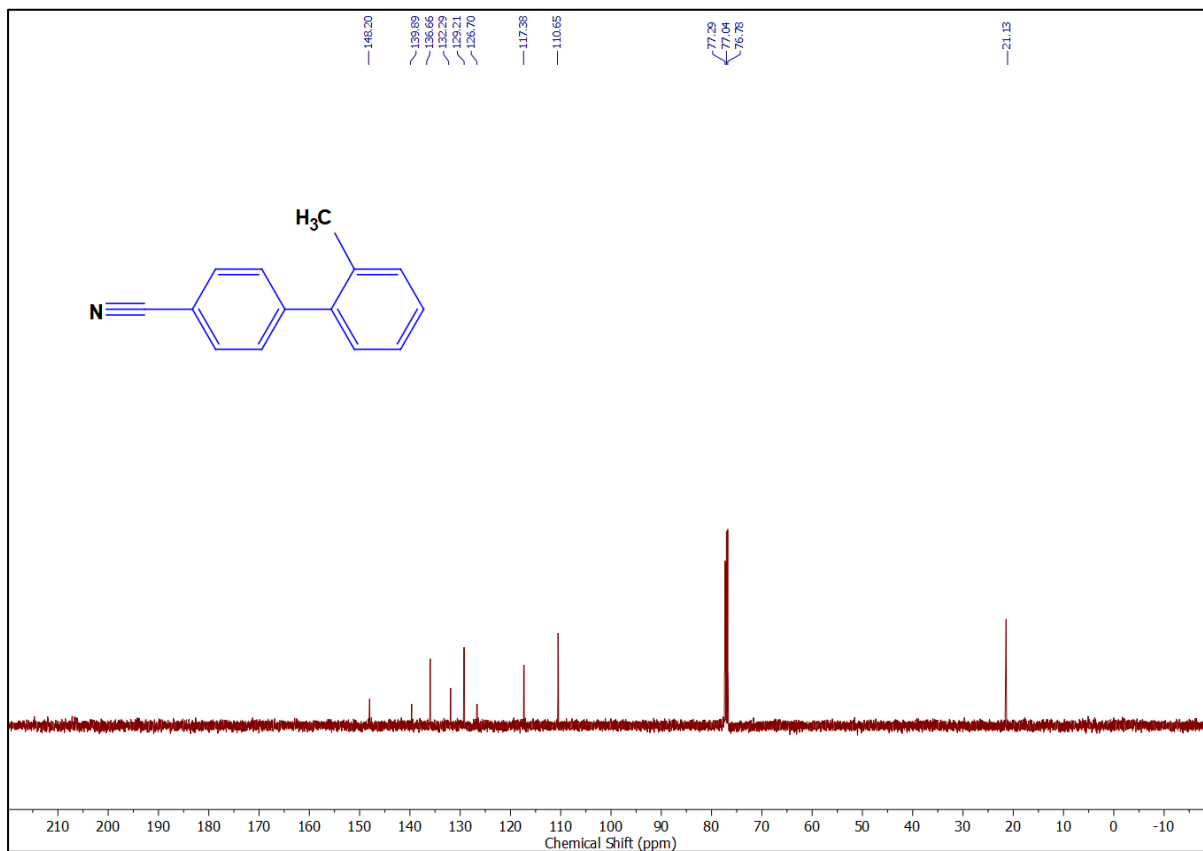

Figure S16: <sup>13</sup>C NMR spectrum of 2'-methyl-[1,1'-biphenyl]-4-carbonitrile

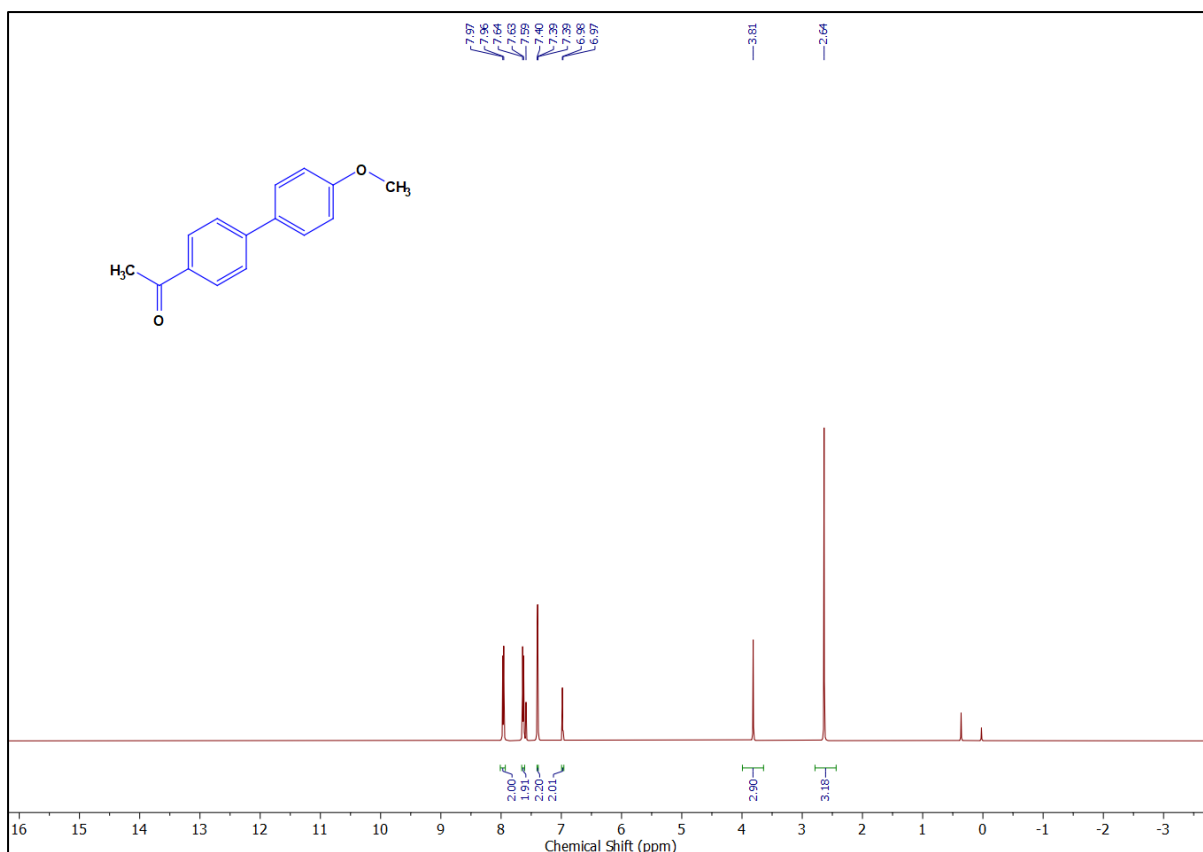

Figure S17: <sup>1</sup>H NMR spectrum of 1-(4'-methoxy-[1,1'-biphenyl]-4-yl)ethan-1-one

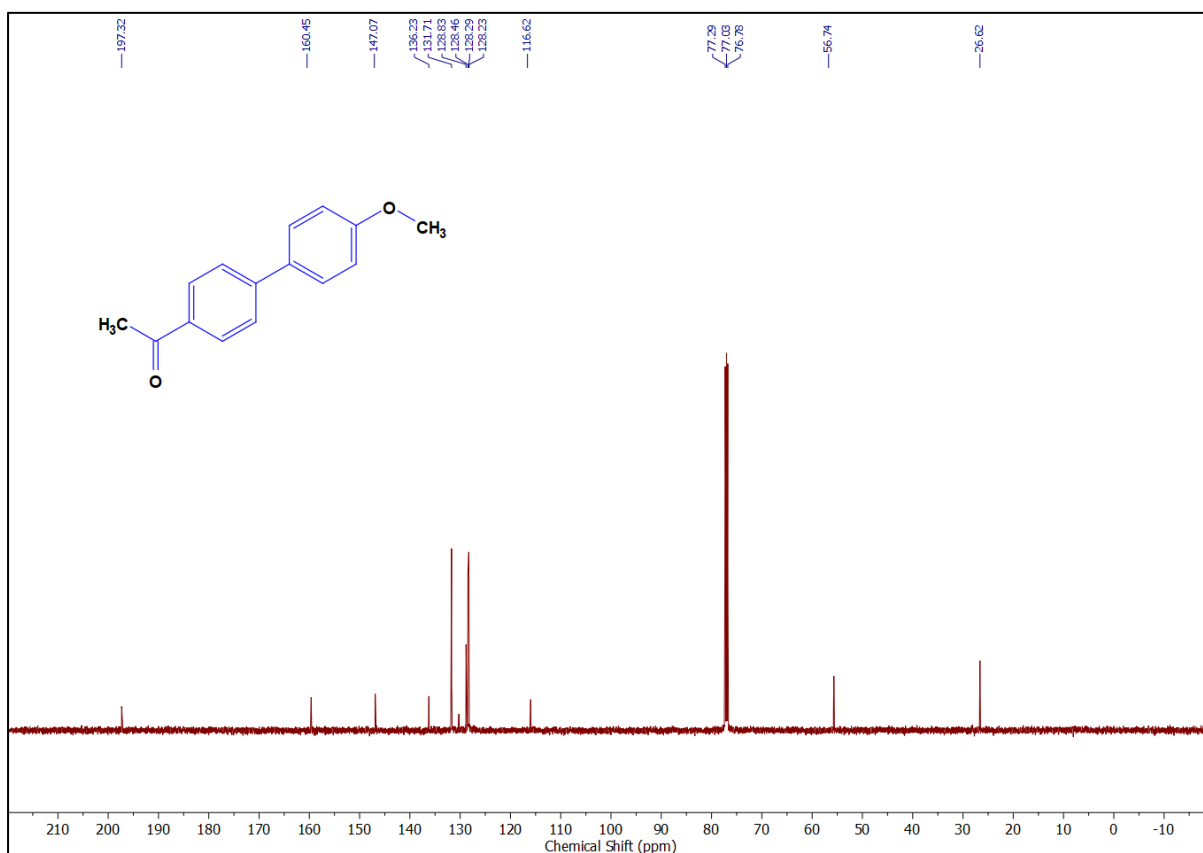

Figure S18: <sup>13</sup>C NMR spectrum of 1-(4'-methoxy-[1,1'-biphenyl]-4-yl)ethan-1-one

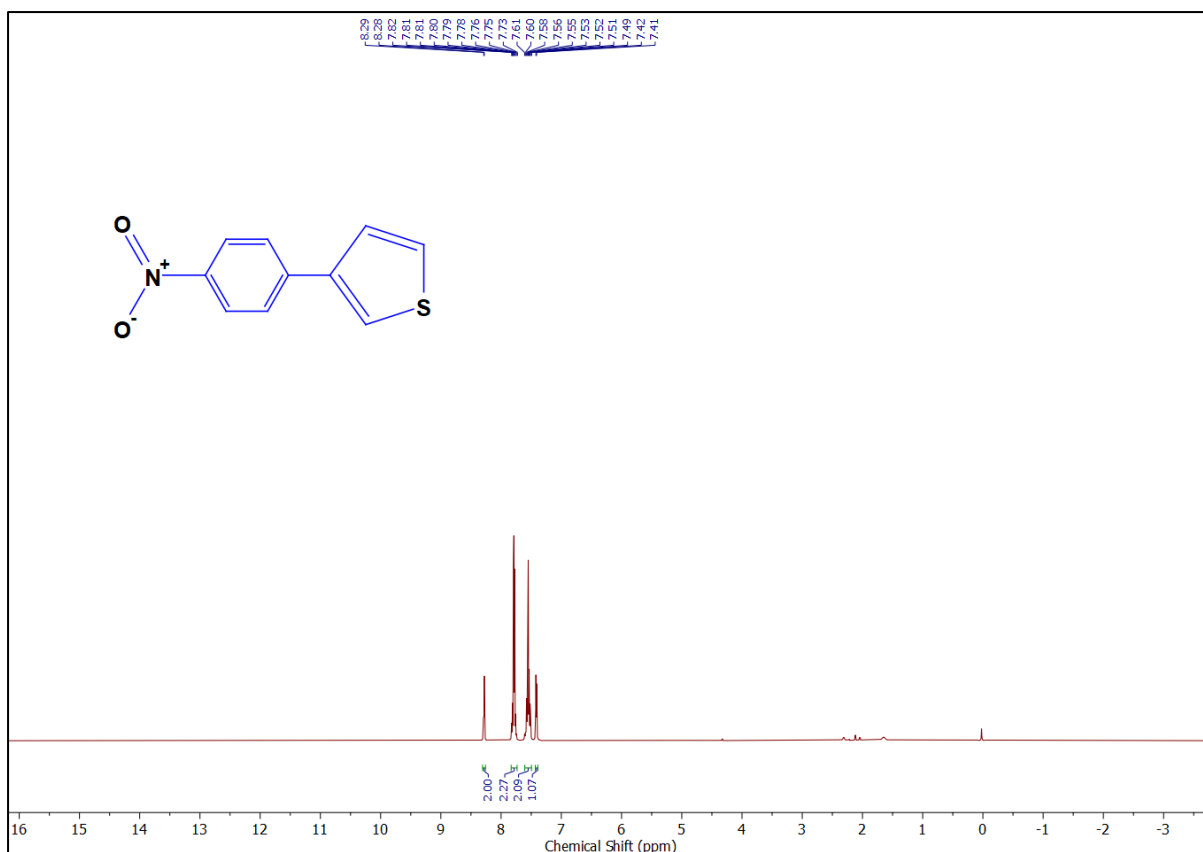

Figure S19:  $^1\text{H}$  NMR spectrum of 3-(4-nitrophenyl)thiophene

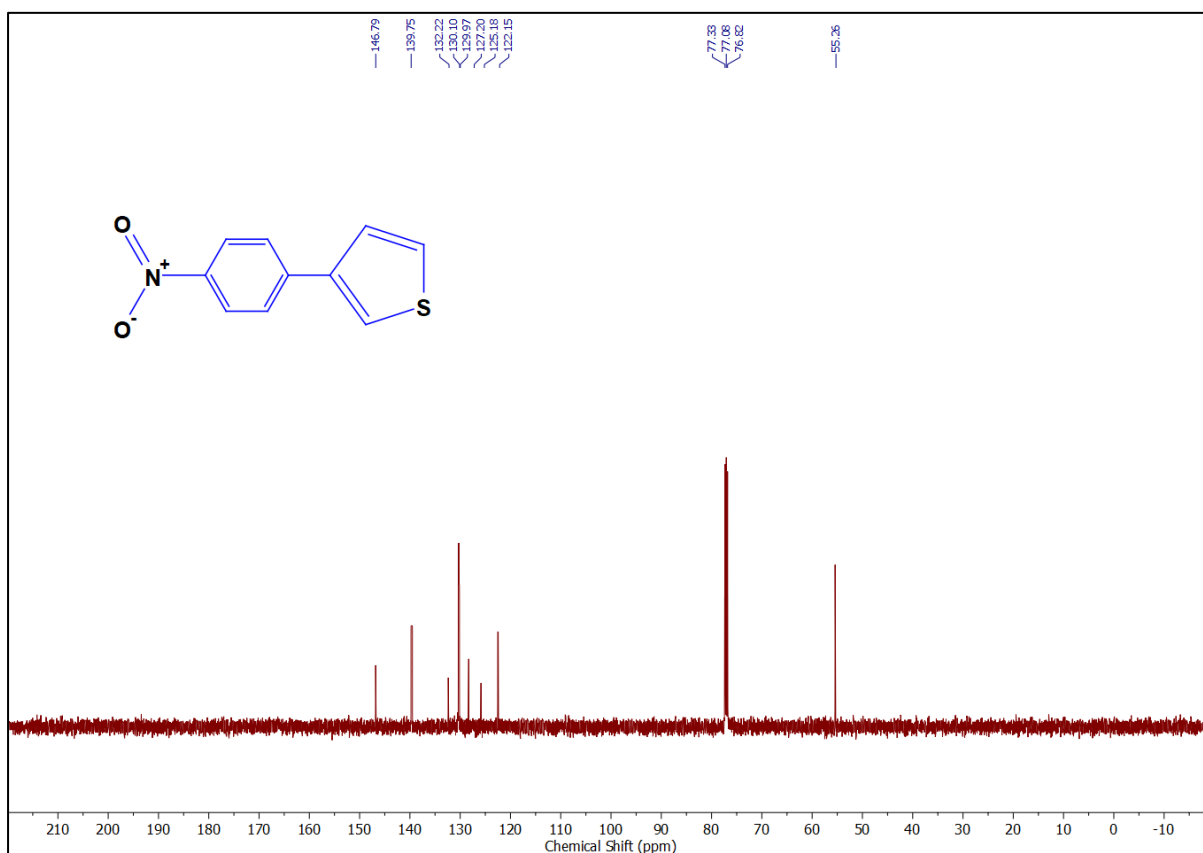

Figure S20:  $^{13}\text{C}$  NMR spectrum of 3-(4-nitrophenyl)thiophene



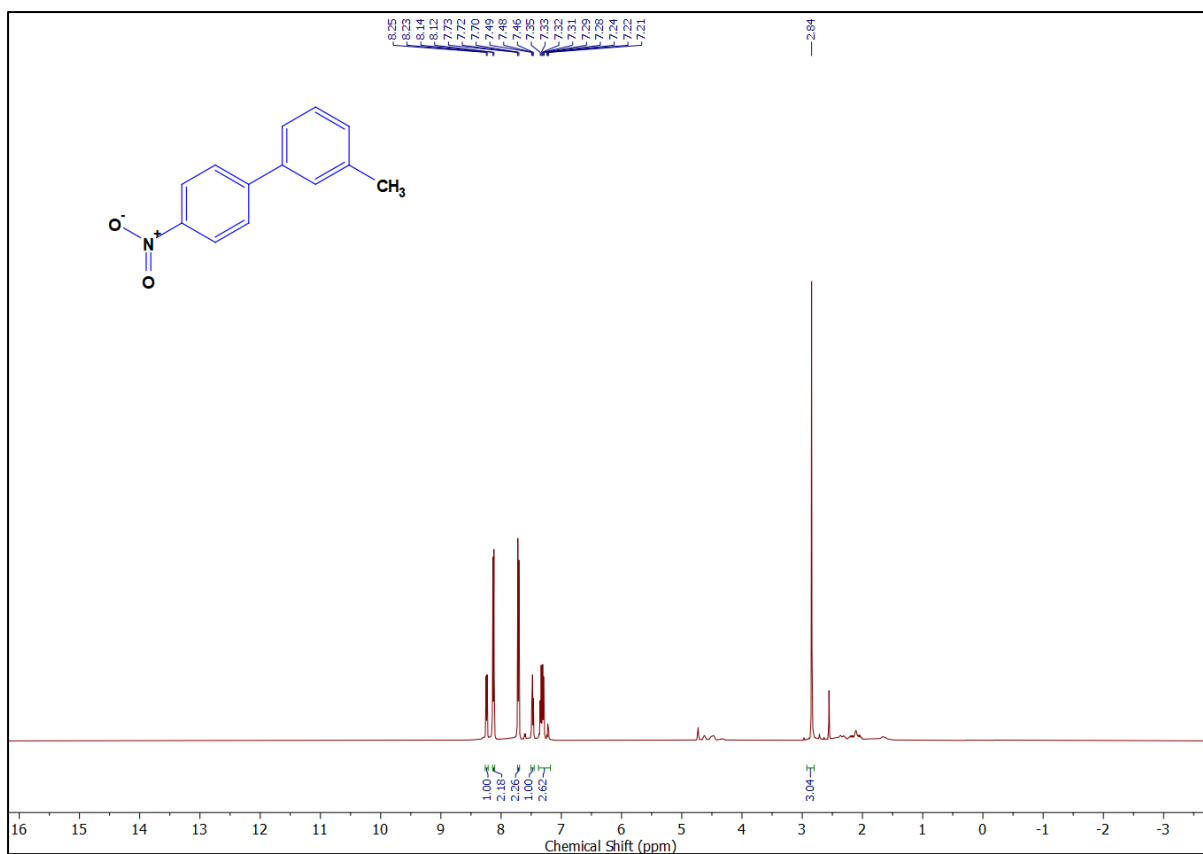

Figure S21:  $^1\text{H}$  NMR spectrum of 3-methyl-4'-nitro-1,1'-biphenyl

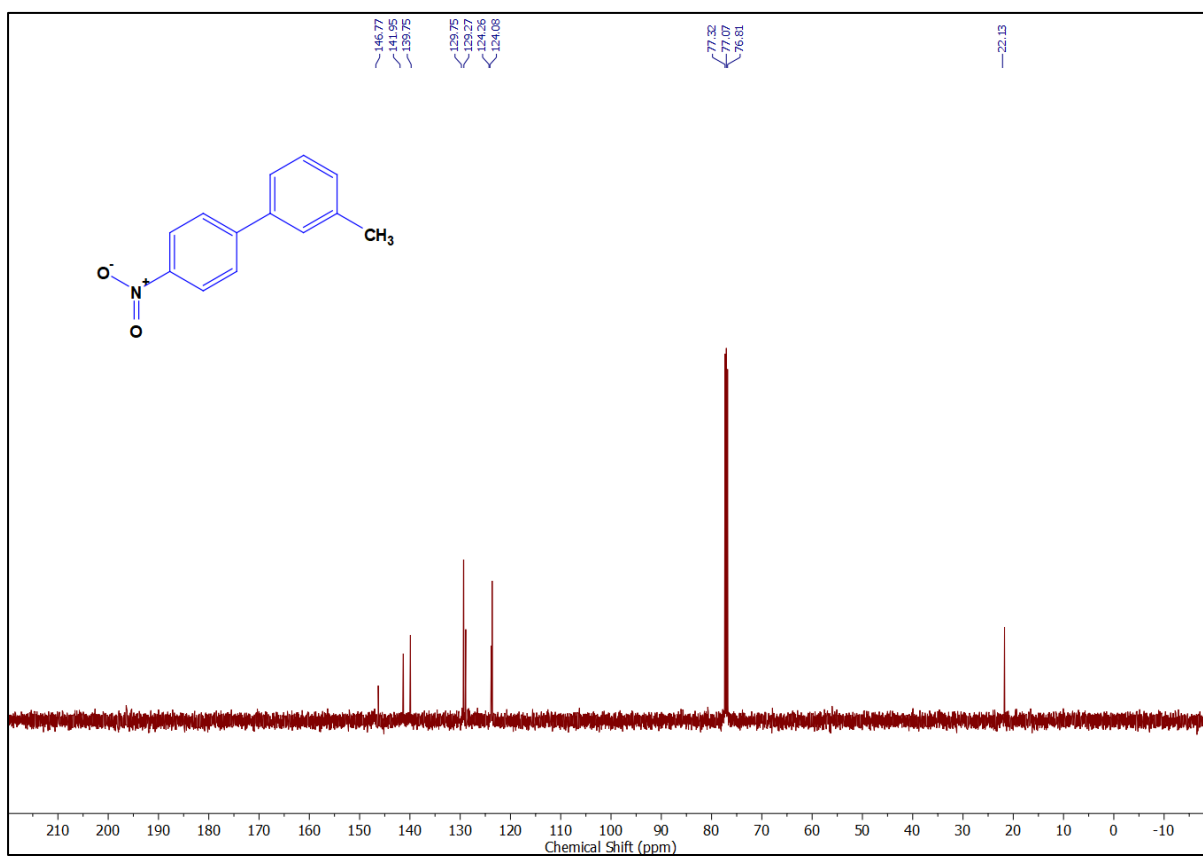

Figure S22:  $^{13}\text{C}$  NMR spectrum of 3-methyl-4'-nitro-1,1'-biphenyl

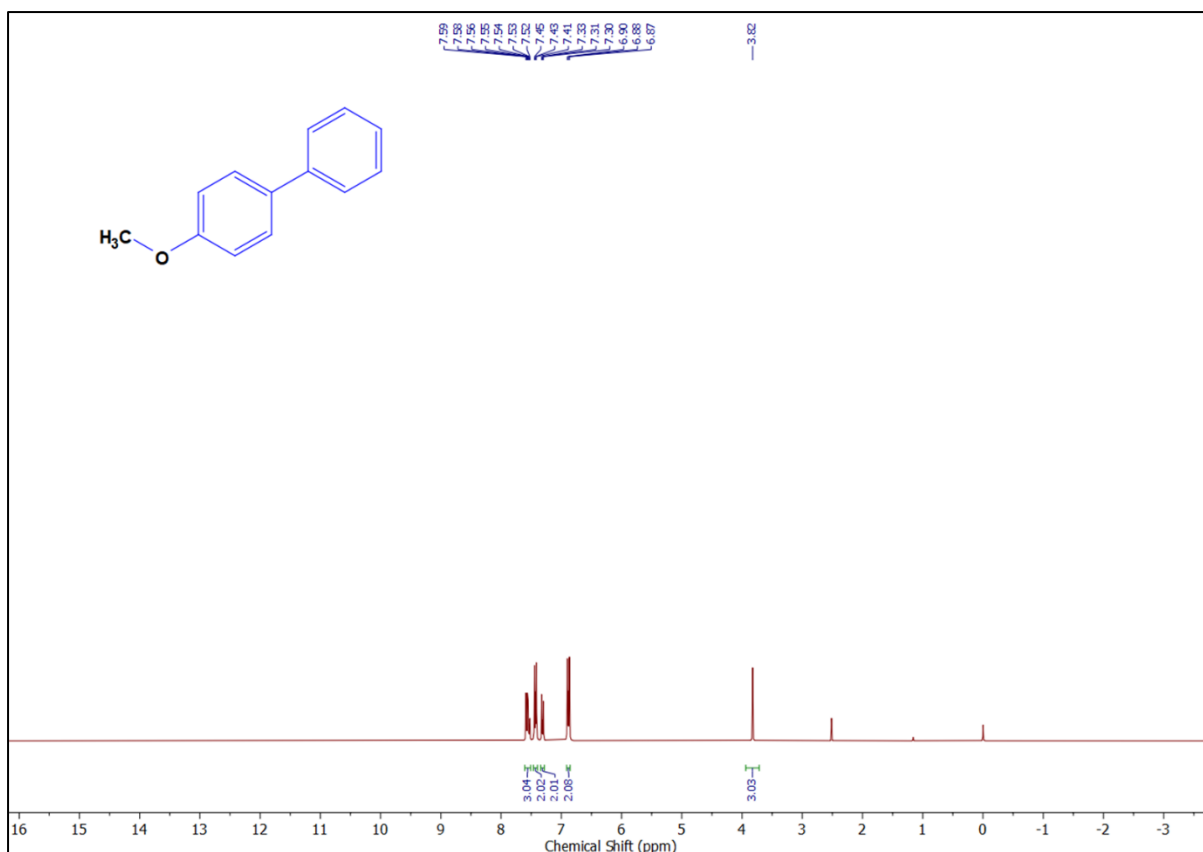

Figure S23: <sup>1</sup>H NMR spectrum of 4-methoxy-1,1'-biphenyl

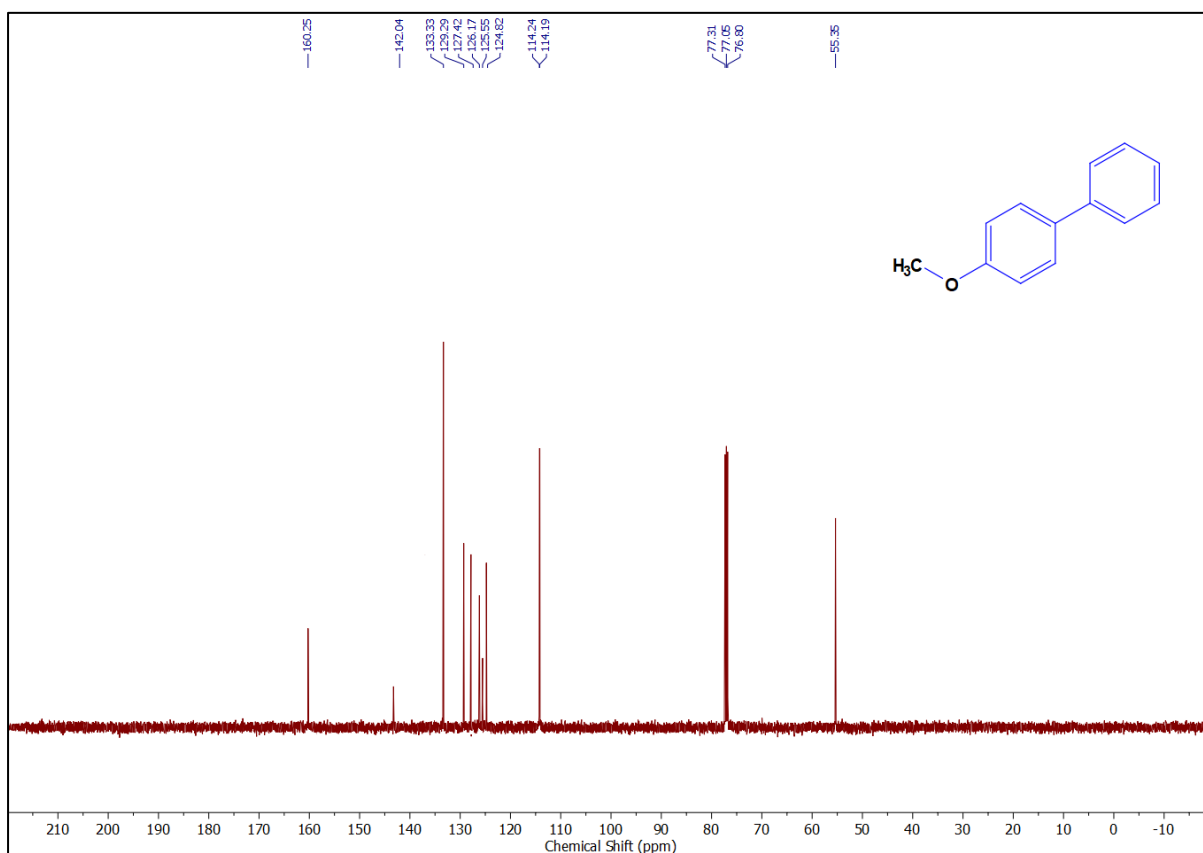

Figure S24: <sup>13</sup>C NMR spectrum of 4-methoxy-1,1'-biphenyl

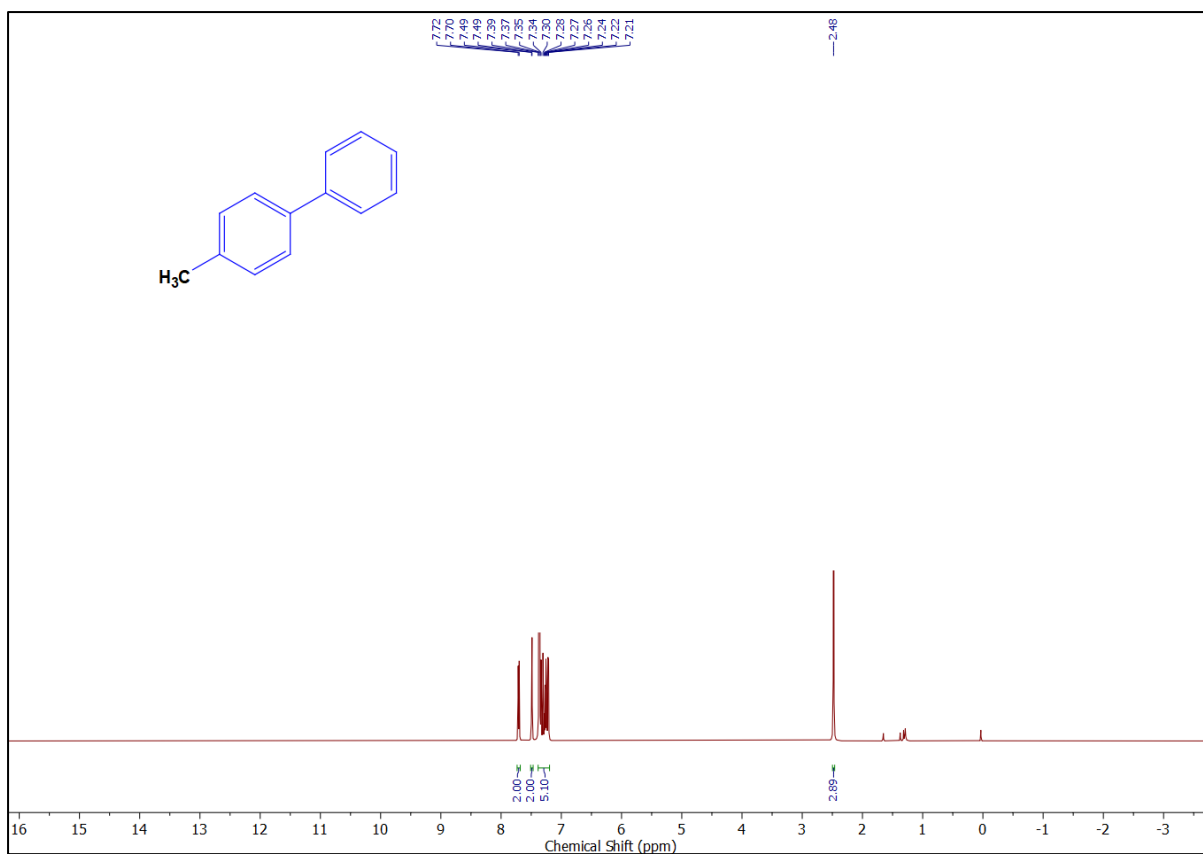

Figure S25:  $^1\text{H}$  NMR spectrum of 4-methyl-1,1'-biphenyl

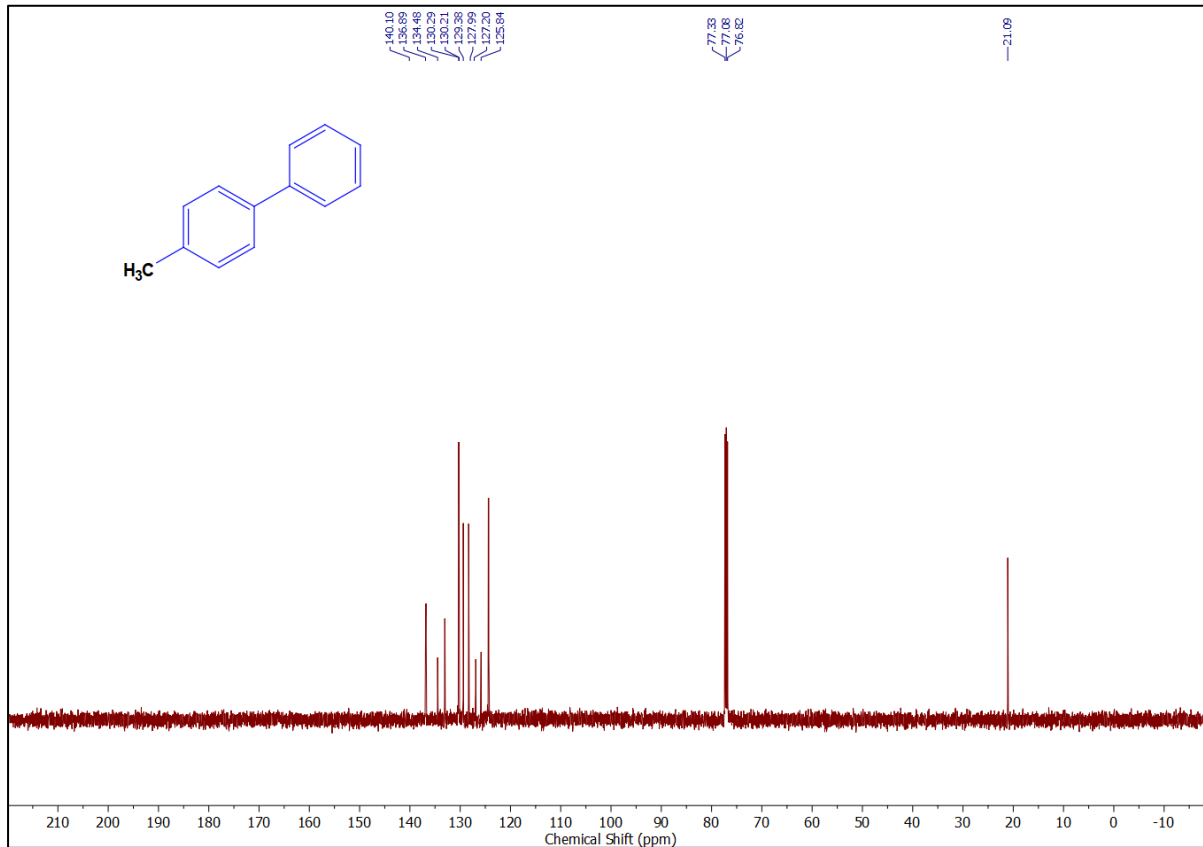

Figure S26:  $^{13}\text{C}$  NMR spectrum of 4-methyl-1,1'-biphenyl

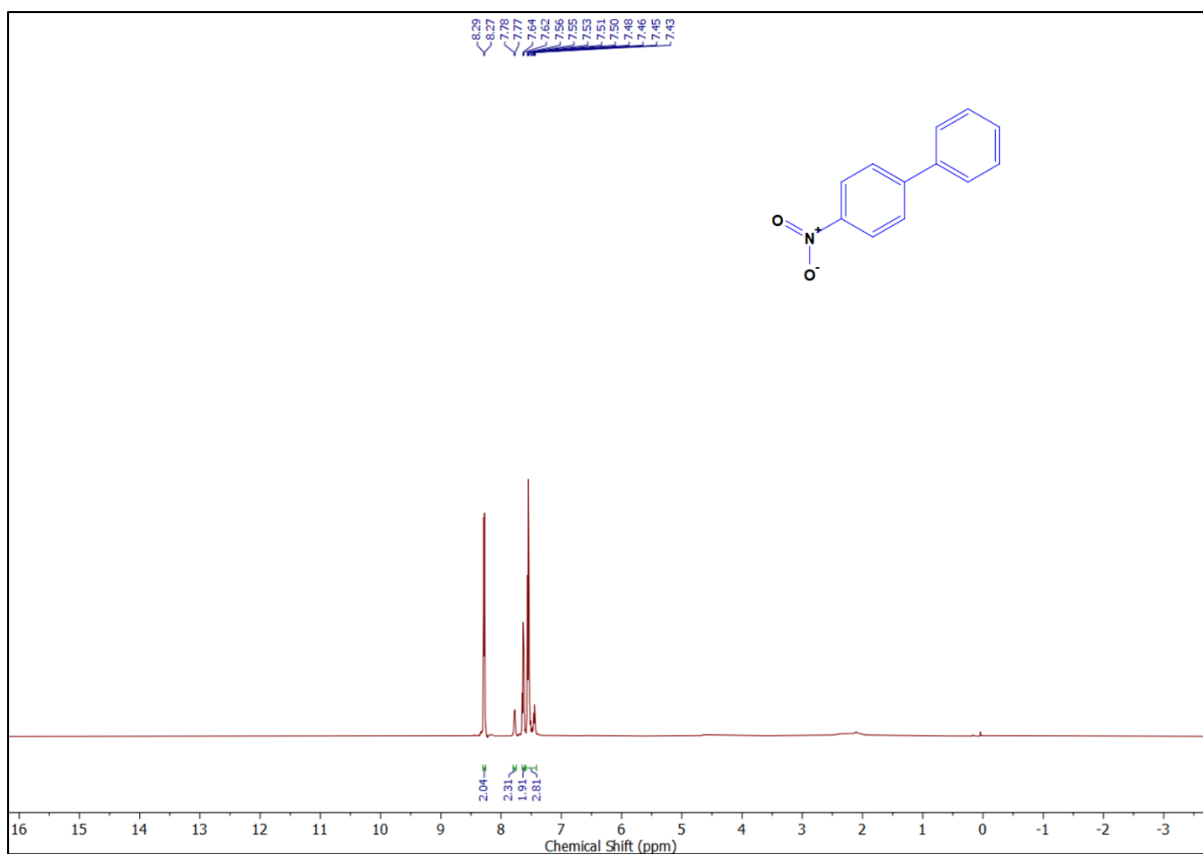

Figure S27:  $^1\text{H}$  NMR spectrum of 4-nitro-1,1'-biphenyl

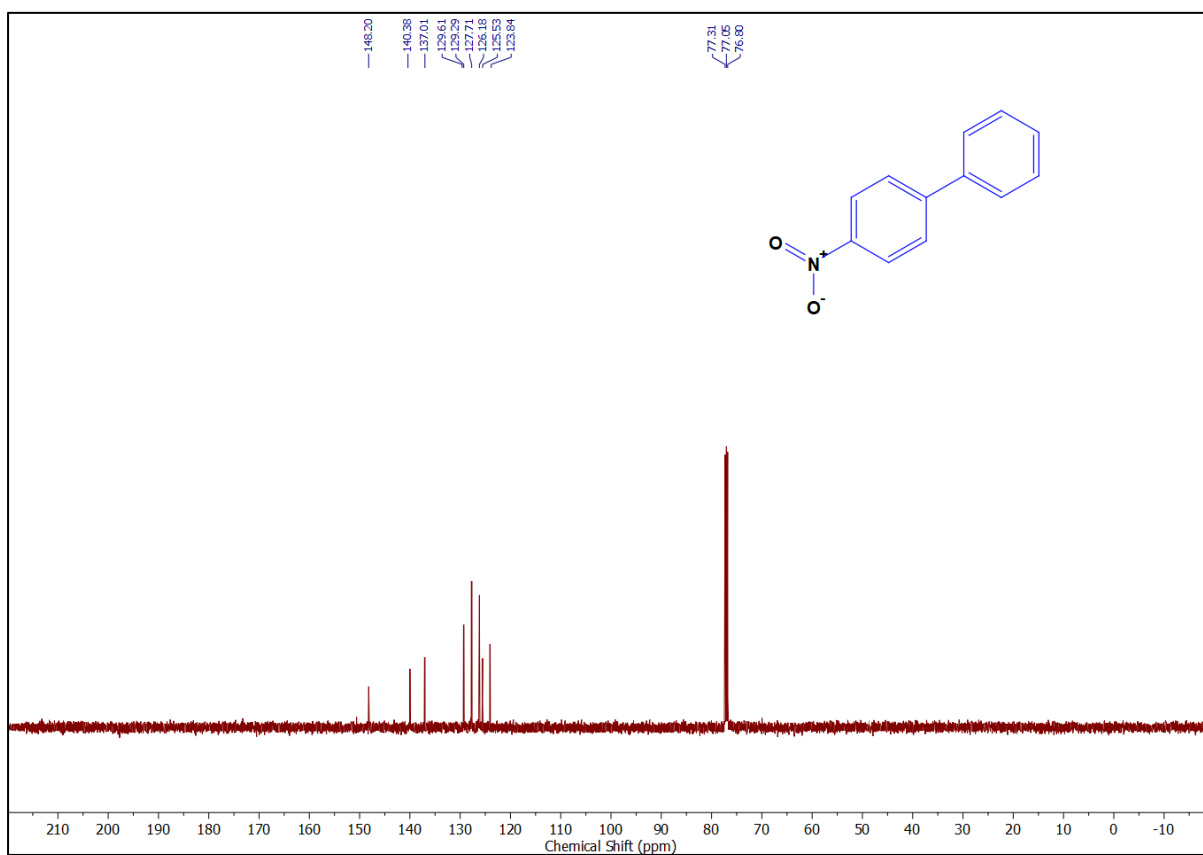

Figure S28:  $^{13}\text{C}$  NMR spectrum of 4-nitro-1,1'-biphenyl

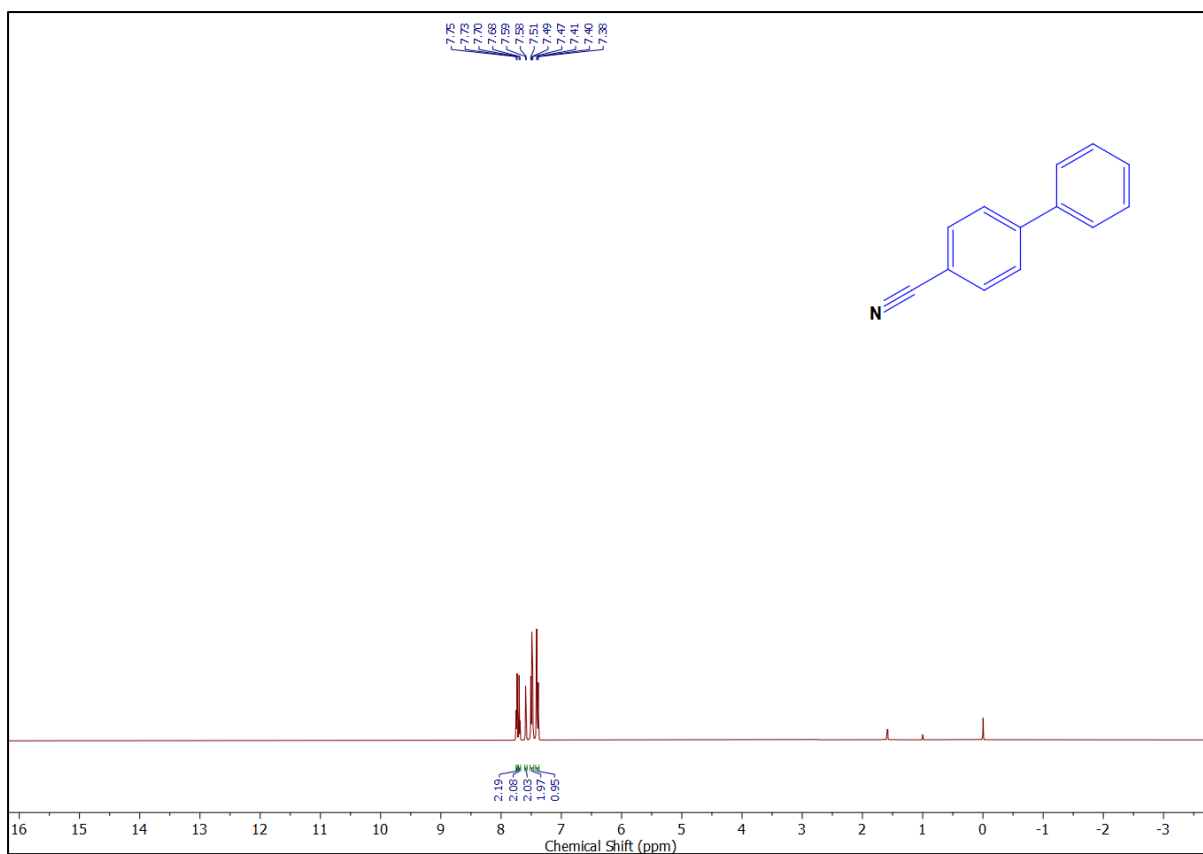

Figure S29:  $^1\text{H}$  NMR spectrum of [1, 1'-biphenyl]-4-carbonitrile

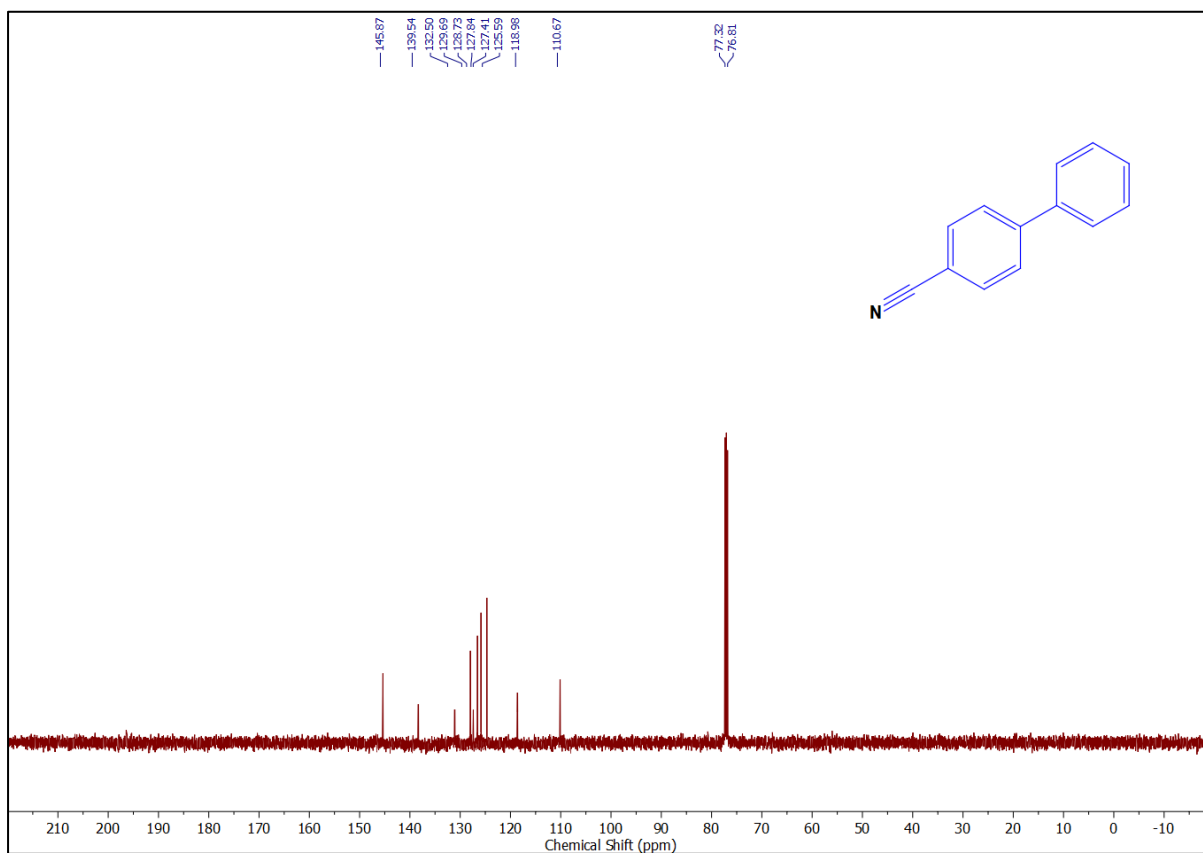

Figure S30:  $^{13}\text{C}$  NMR spectrum of [1, 1'-biphenyl]-4-carbonitrile

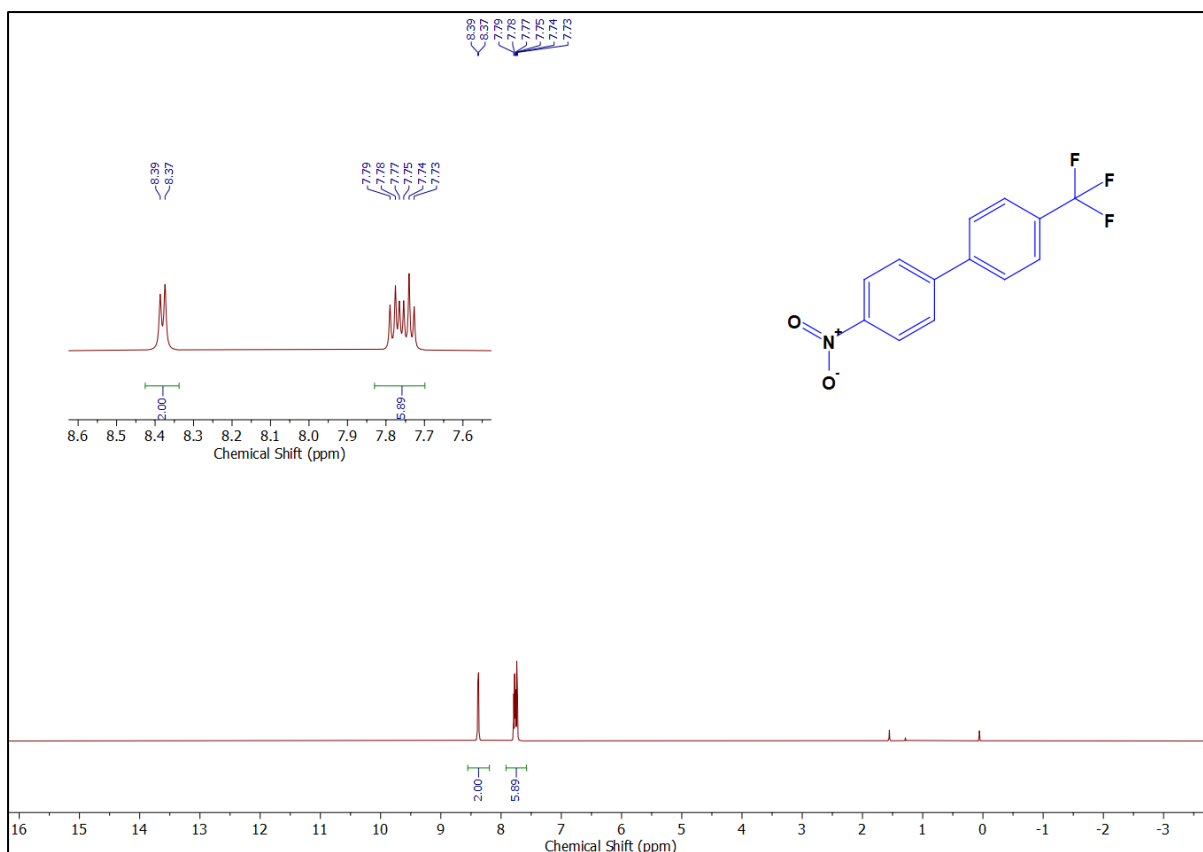

**Figure S31:** <sup>1</sup>H NMR spectrum of 4-nitro-4'-(trifluoromethyl)-1,1'-biphenyl

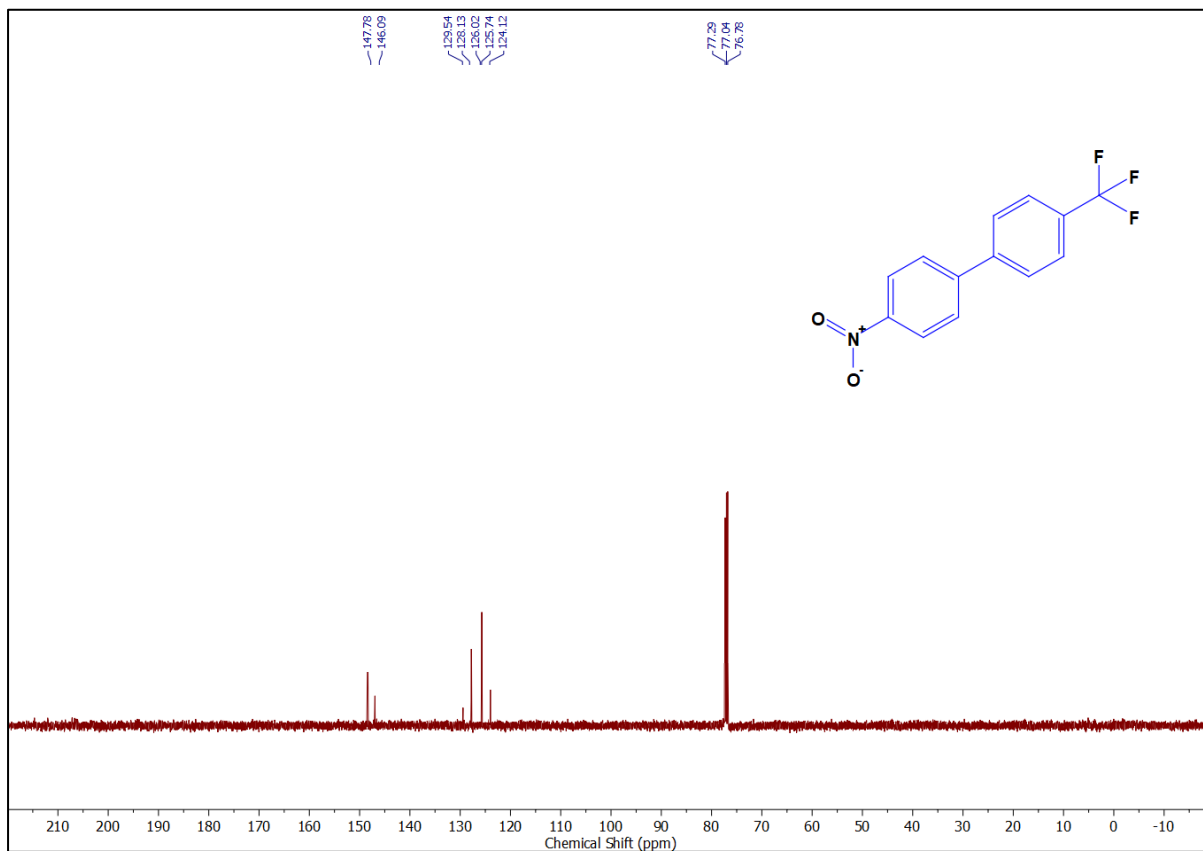

**Figure S32:** <sup>13</sup>C NMR spectrum of 4-nitro-4'-(trifluoromethyl)-1,1'-biphenyl

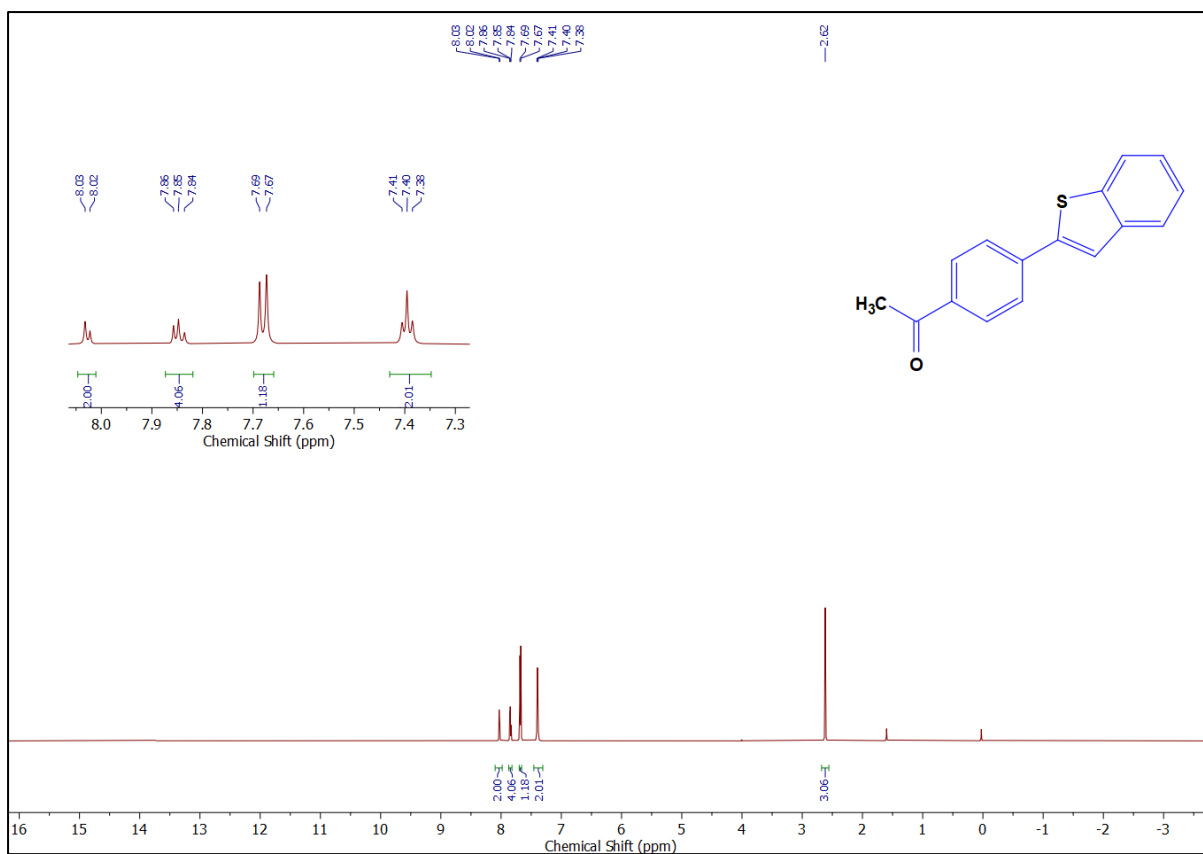

Figure S33: <sup>1</sup>H NMR spectrum of 1-(4-(benzo[b]thiophen-2-yl)phenyl)ethan-1-one

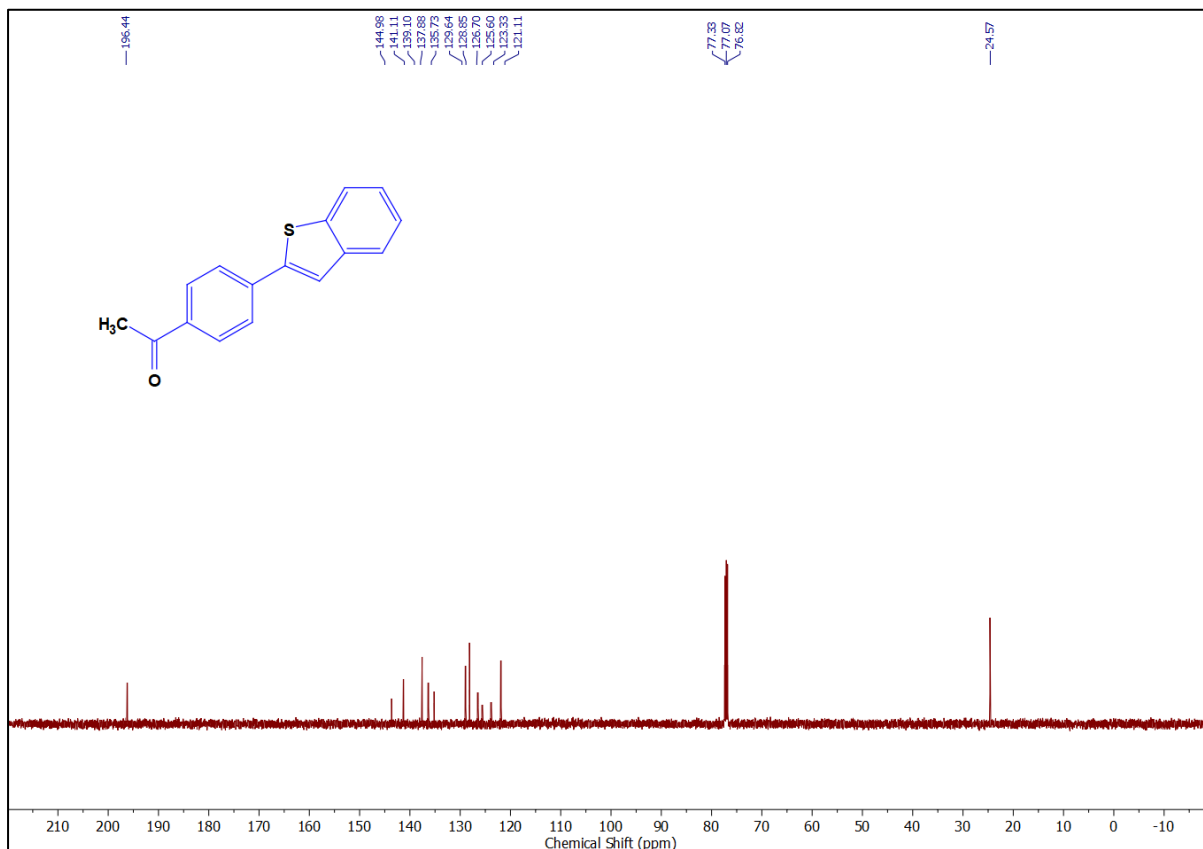

Figure S34: <sup>13</sup>C NMR spectrum of 1-(4-(benzo[b]thiophen-2-yl)phenyl)ethan-1-one

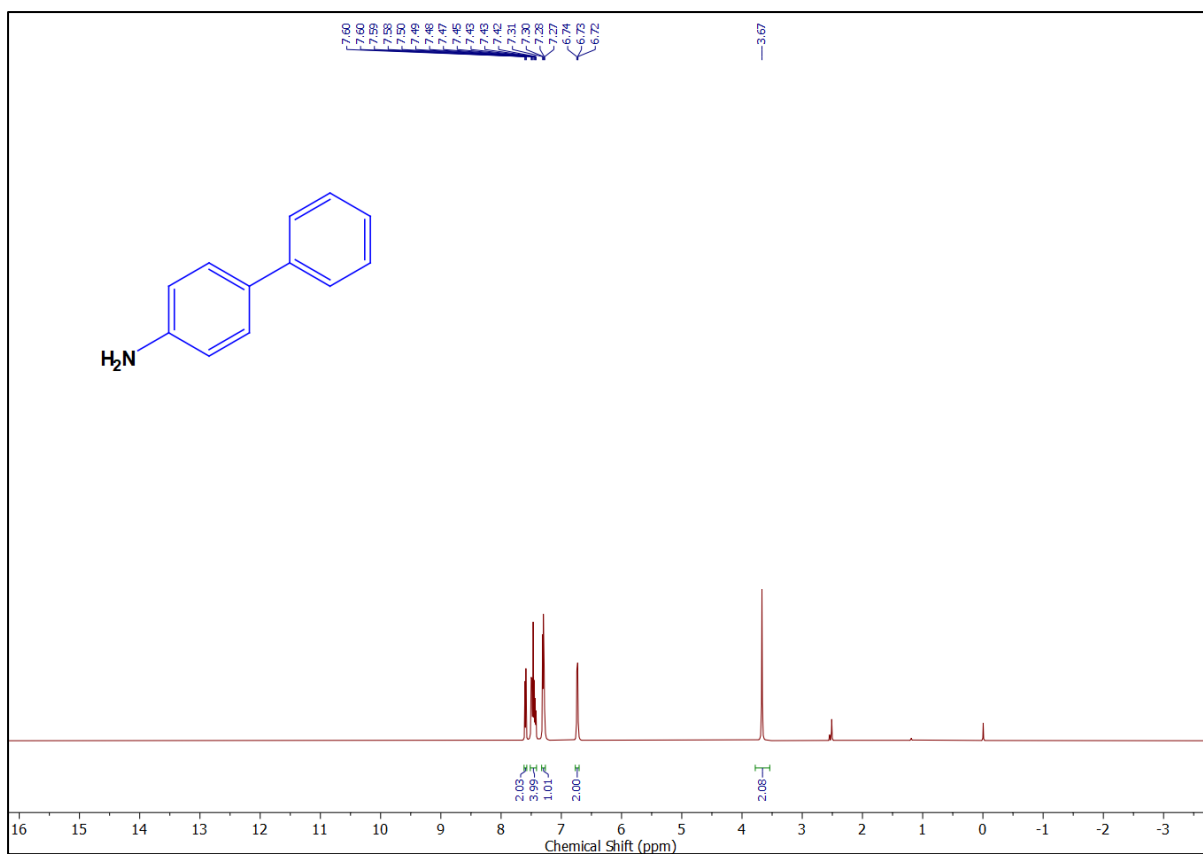

Figure S35: <sup>1</sup>H NMR spectrum of [1,1'-biphenyl]-4-amine

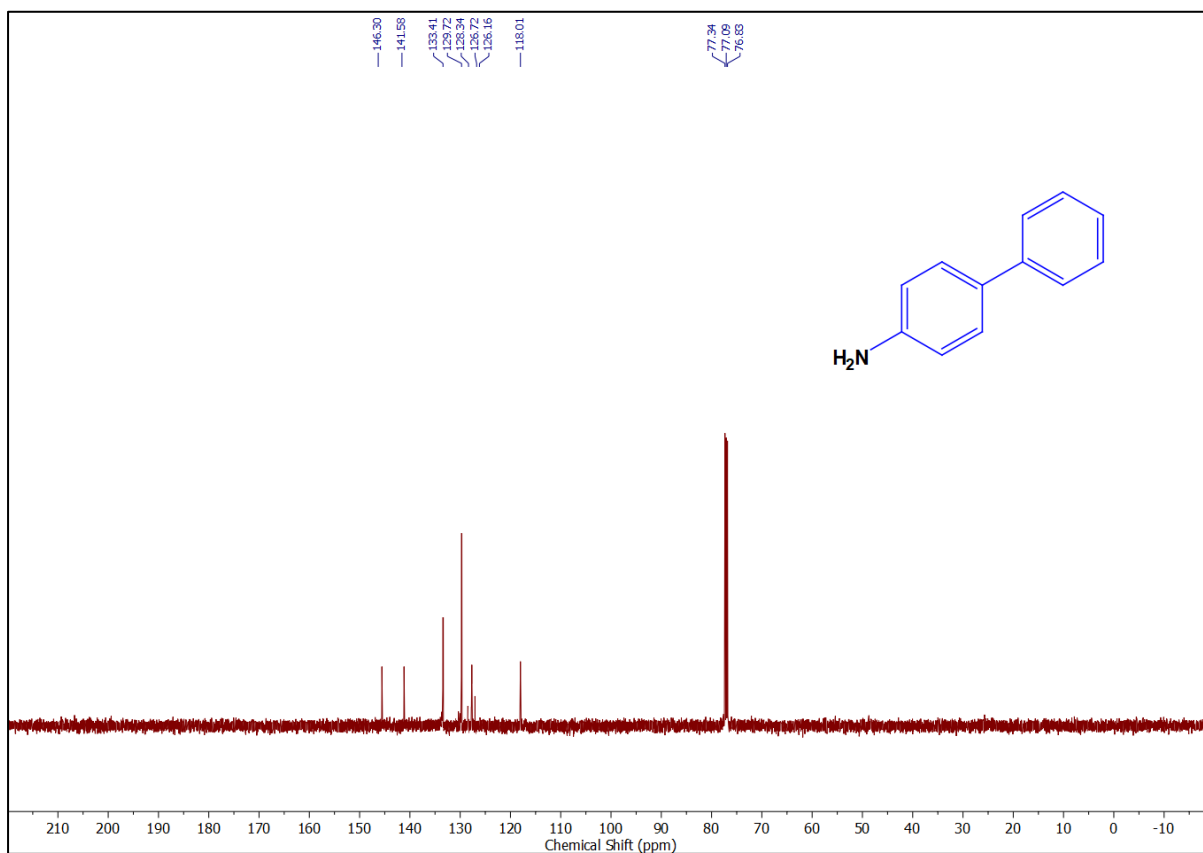

Figure S36: <sup>13</sup>C NMR spectrum of [1,1'-biphenyl]-4-amine



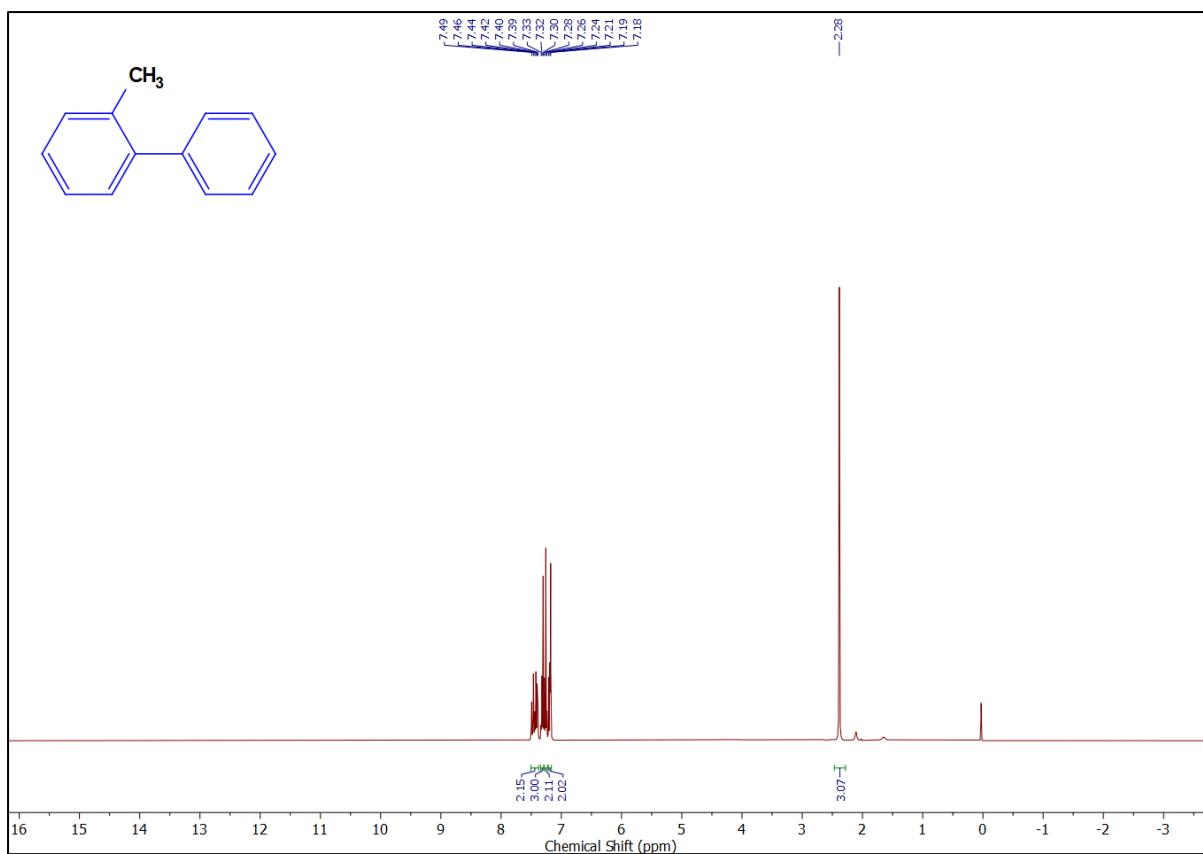

Figure S37: <sup>1</sup>H NMR spectrum of 2-methyl-1,1'-biphenyl

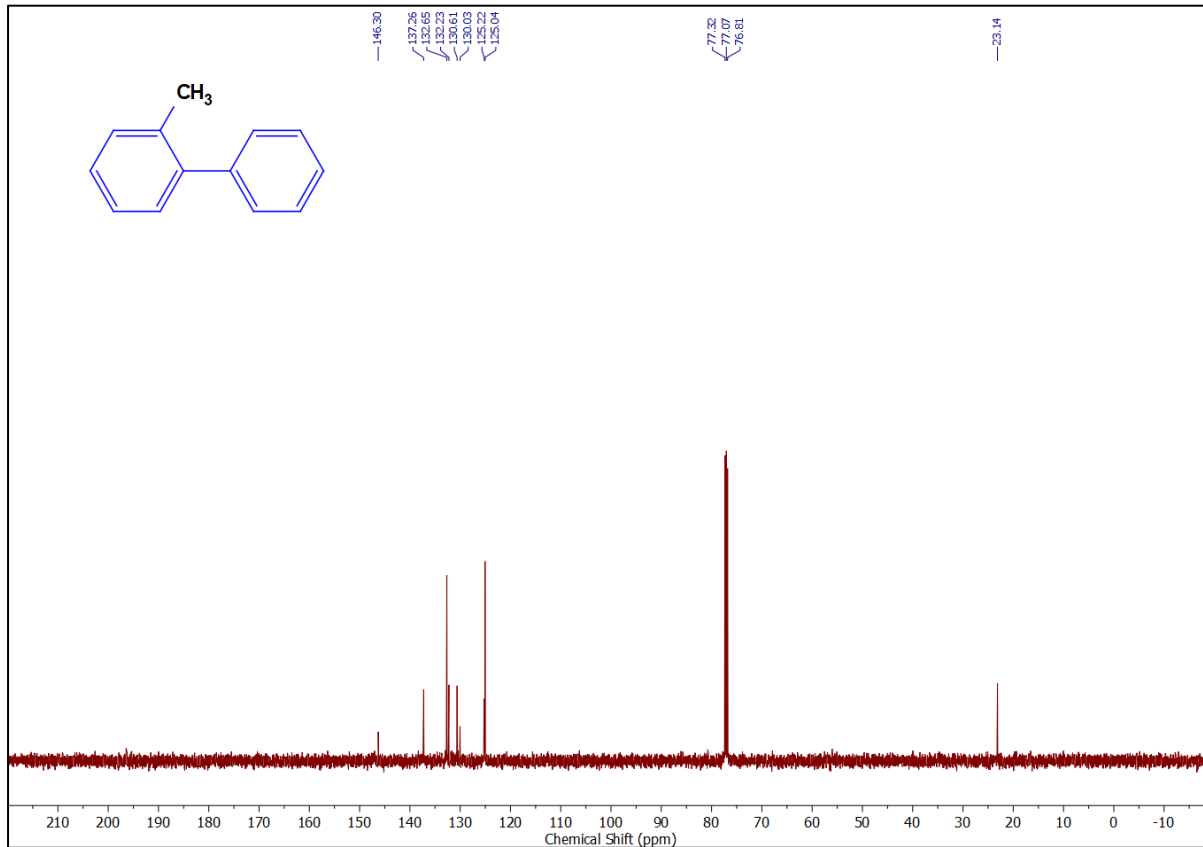

Figure S38: <sup>13</sup>C NMR spectrum of 2-methyl-1,1'-biphenyl

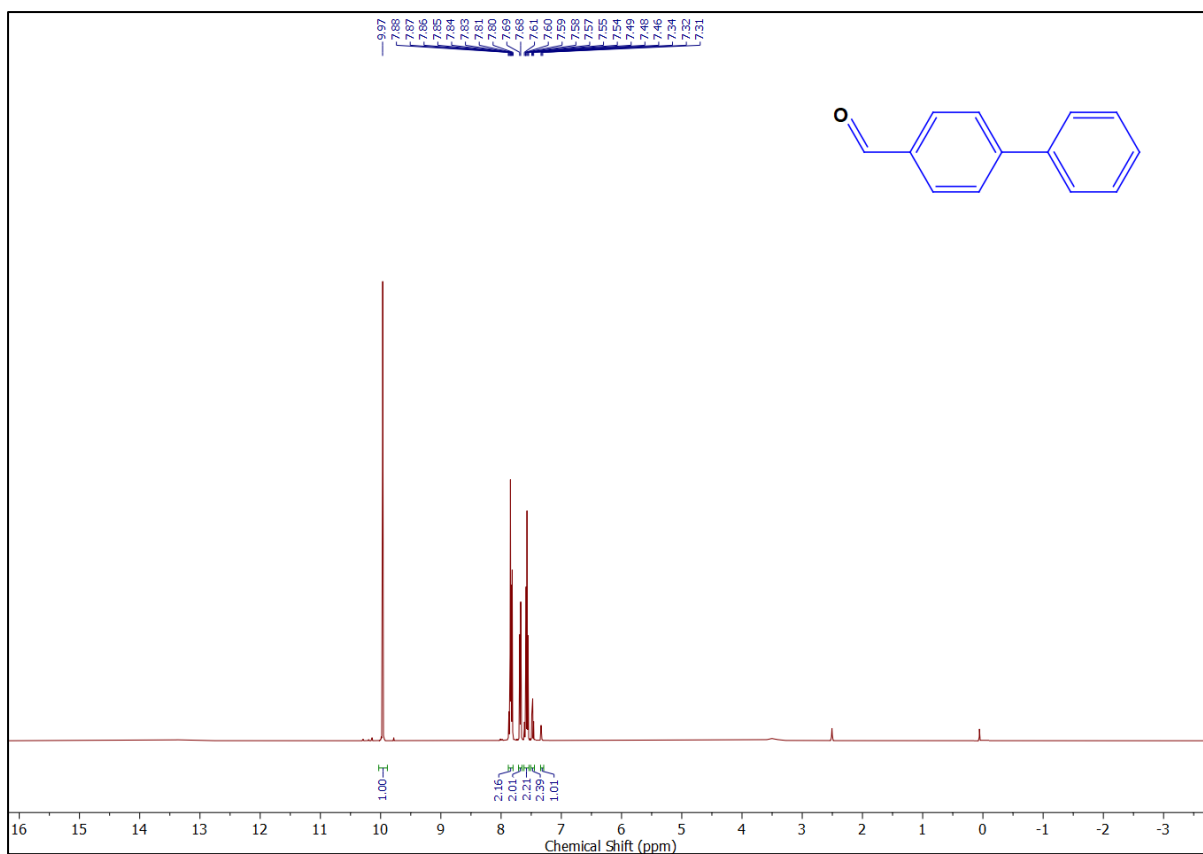

Figure S39:  $^1\text{H}$  NMR spectrum of [1,1'-biphenyl]-4-carbaldehyde

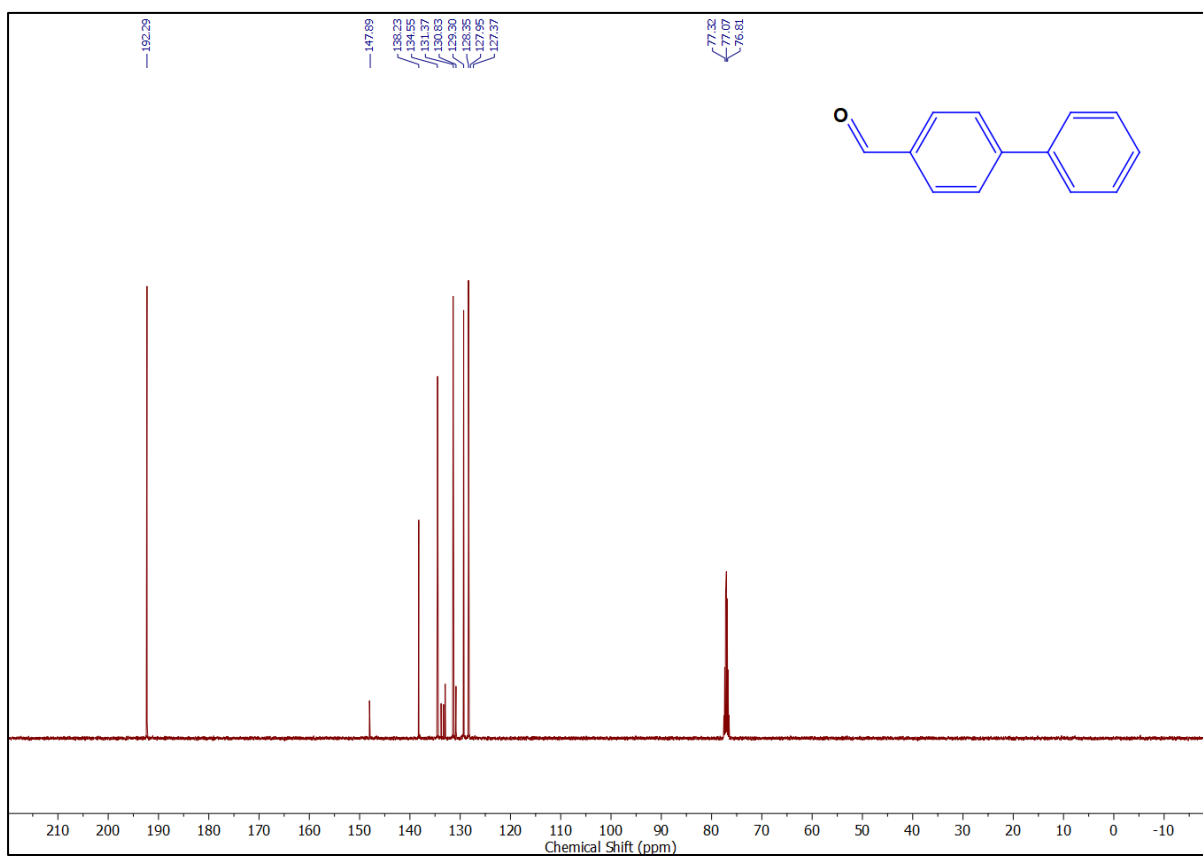

Figure S40:  $^{13}\text{C}$  NMR spectrum of [1,1'-biphenyl]-4-carbaldehyde

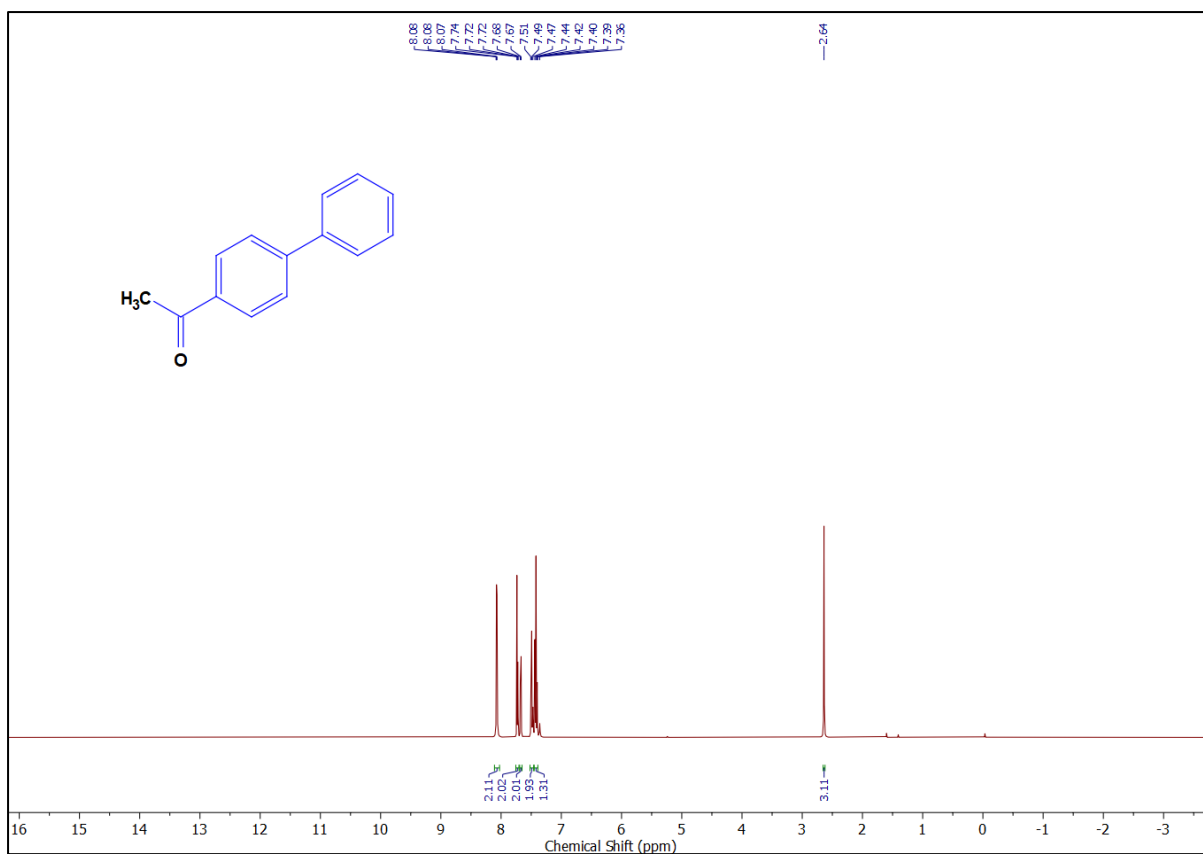

Figure S41: <sup>1</sup>H NMR spectrum of 1-([1,1'-biphenyl]-4-yl)ethan-1-one

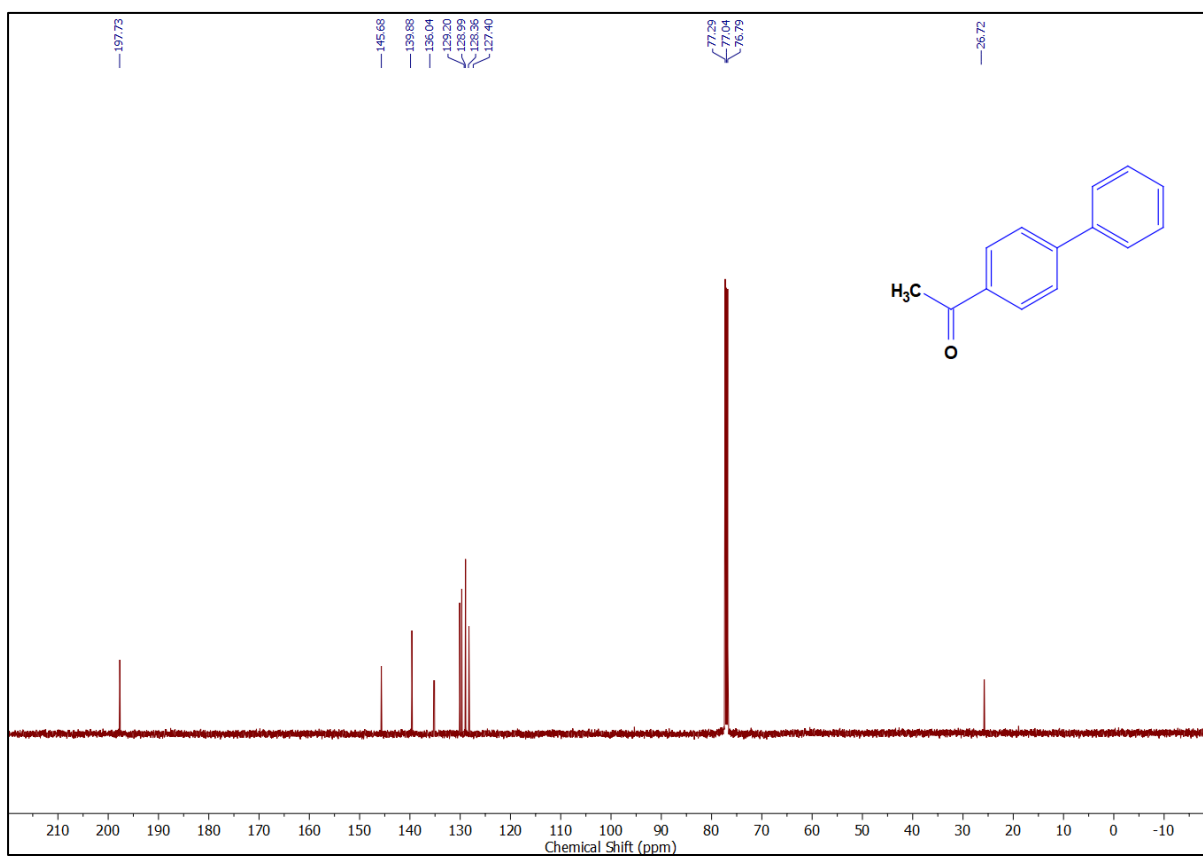

Figure S42: <sup>13</sup>C NMR spectrum of 1-([1,1'-biphenyl]-4-yl)ethan-1-one

## 7. ESI-MS Spectra of compounds:

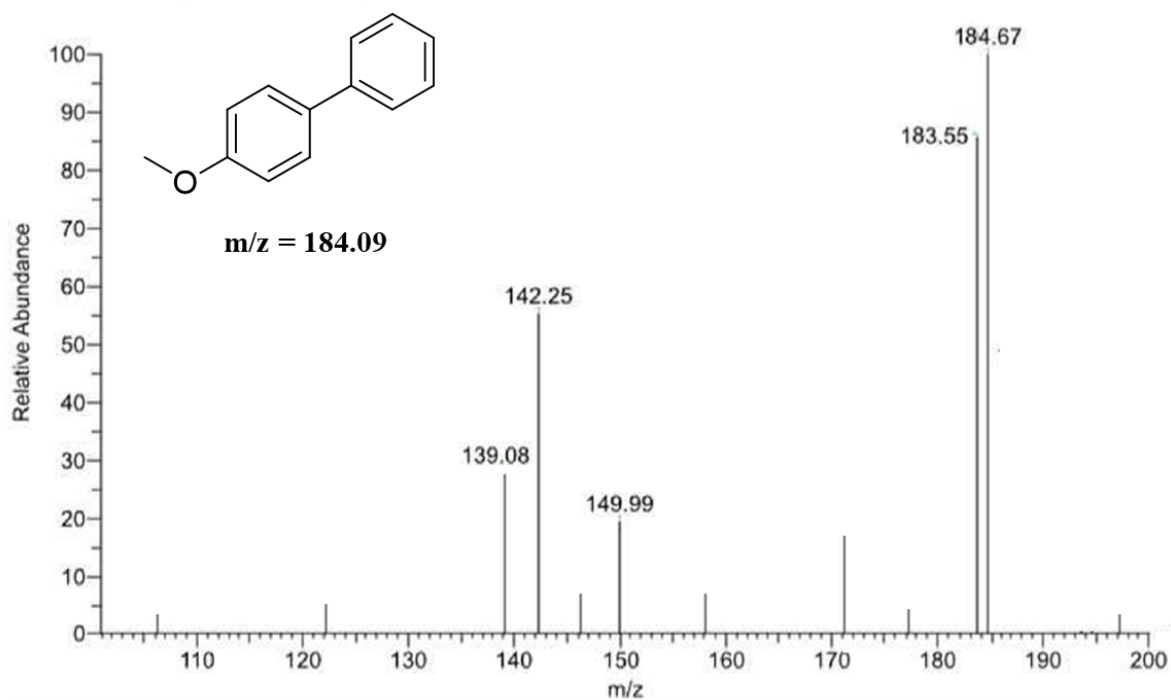

Fig.S43: ESI-MS m/z peak of 4-methoxy-1,1'-biphenyl

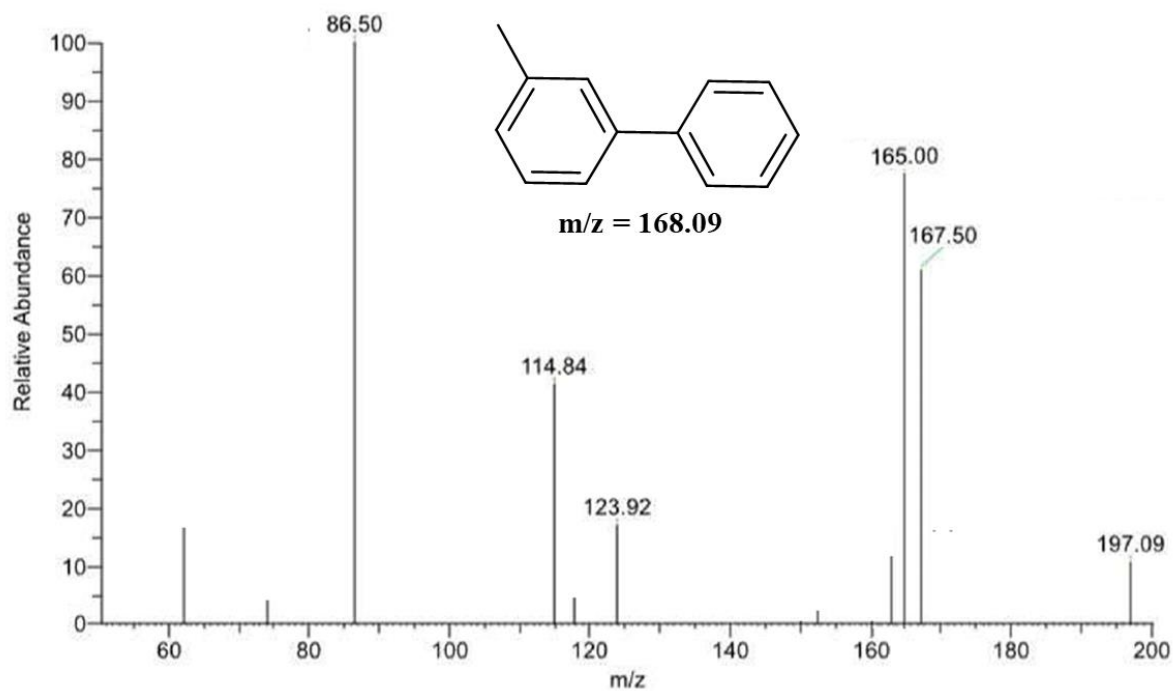

Fig.S44: ESI-MS m/z peak of 3-methyl-1,1'-biphenyl

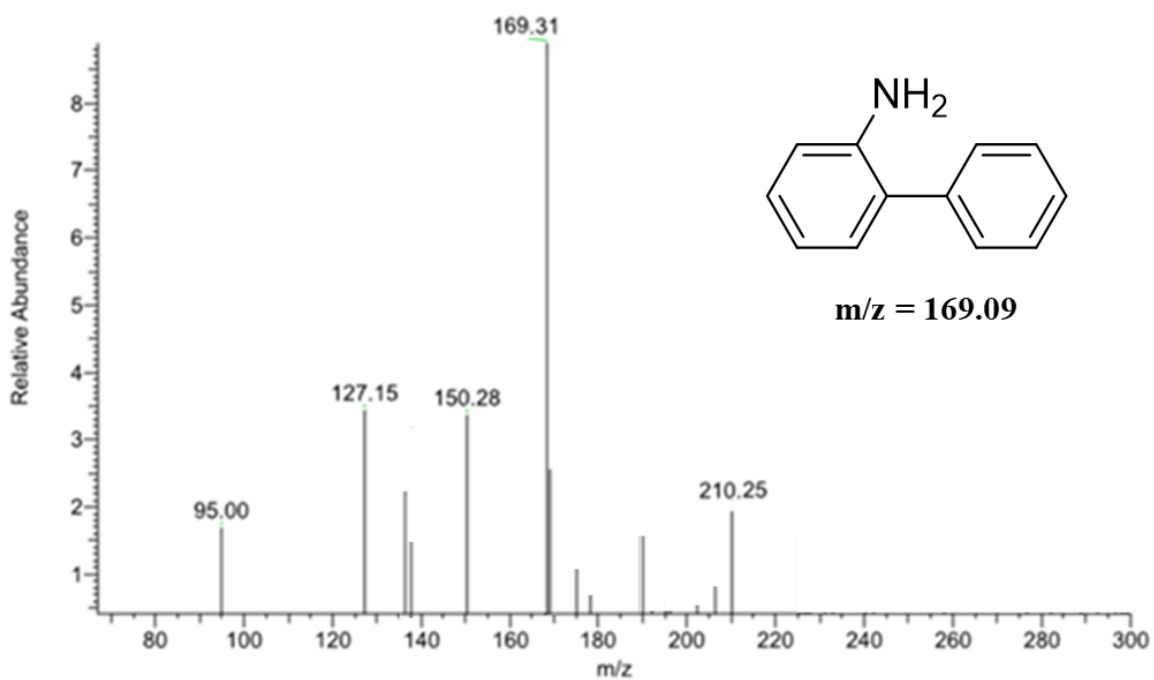

Fig.S45: ESI-MS m/z peak of [1,1'-biphenyl]-2-amine

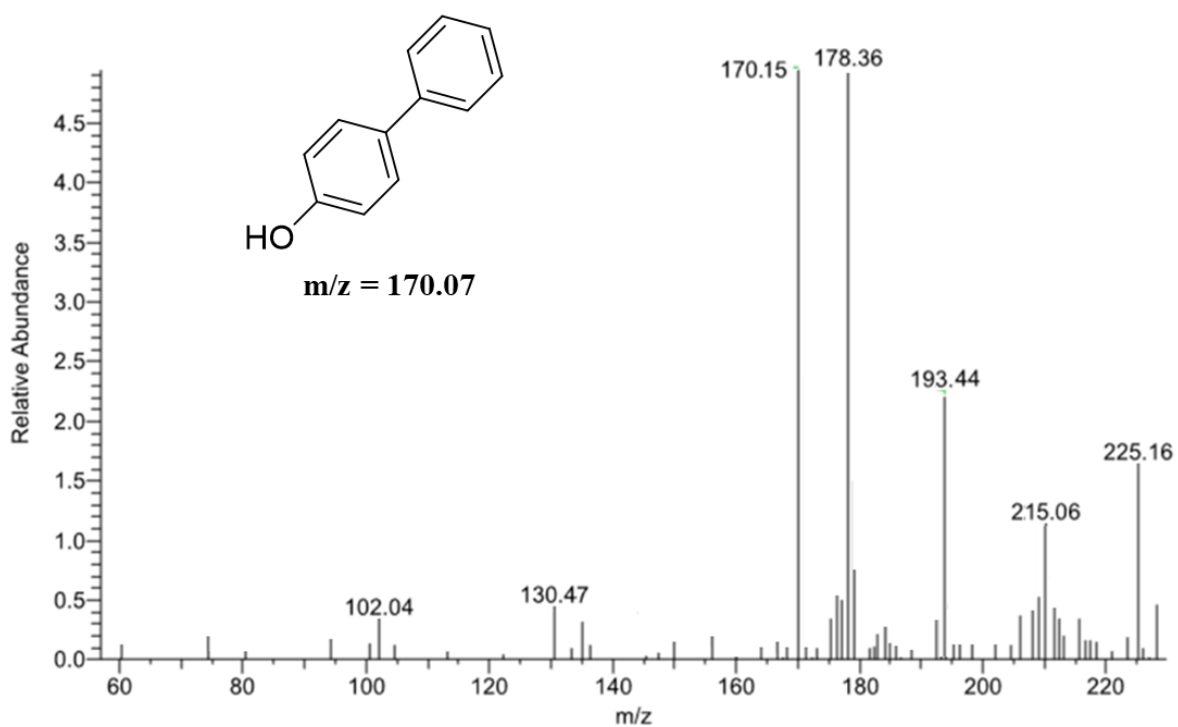

Fig.S46: ESI-MS m/z peak of [1,1'-biphenyl]-4-ol
